# Supplementary material for: Chloroplast Genome Comparison and Evolution Analysis of Dendrobium (Orchidaceae) among Multiple Photosynthetic Pathways
Source: Preprints.org preprint supplement (doi:10.20944/preprints202312.2150.v1), 2023-12-29
Supplement: Supplementary file 1 [file supplementary]

## Sheet: 总多态性分析3
Window	Midpoint	Pi	Theta	S
61742-61901	61811	0.15089	0.20149	57	rbcL-accD
61717-61837	61771	0.14511	0.20149	57	rbcL-accD
59430-59676	59541	0.14133	0.21563	61	atpB-rbcL
61772-61967	61837	0.13911	0.18381	52	rbcL-accD
59472-59727	59609	0.13556	0.20502	58	atpB-rbcL
61681-61811	61741	0.13178	0.19795	56	rbcL-accD
59378-59609	59471	0.13022	0.19795	56	atpB-rbcL
59843-59975	59892	0.12311	0.20149	57	rbcL
59818-59950	59867	0.12267	0.19088	54	rbcL
59761-59892	59842	0.12244	0.19795	56	atpB-rbcL
59542-59760	59676	0.122	0.18028	51	atpB-rbcL
62308-62479	62417	0.12044	0.19088	54	accD
61005-61121	61070	0.12	0.21209	60	rbcL
59728-59867	59817	0.118	0.18735	53	atpB-rbcL
60754-60871	60803	0.11756	0.20149	57	rbcL
61397-61608	61545	0.11667	0.20149	57	rbcL-accD
61422-61633	61583	0.11667	0.19088	54	rbcL-accD
61368-61583	61421	0.11622	0.19795	56	rbcL-accD
61812-61992	61901	0.116	0.1626	46	rbcL-accD
59213-59377	59271	0.11511	0.18028	51	atpB-rbcL
60482-60616	60535	0.11511	0.19795	56	rbcL
60536-60691	60616	0.11511	0.19795	56	rbcL
50415-50785	50512	0.11467	0.15907	45	trnL-UAA
61339-61545	61396	0.11467	0.19442	55	rbcL-accD
61030-61157	61095	0.114	0.20149	57	rbcL
61546-61680	61608	0.11267	0.18381	52	rbcL-accD
60304-60506	60452	0.112	0.19795	56	rbcL
60728-60844	60778	0.112	0.19795	56	rbcL
59326-59541	59429	0.11156	0.18381	52	atpB-rbcL
61609-61741	61680	0.11156	0.18028	51	rbcL-accD
61233-61367	61312	0.11133	0.18381	52	rbcL
60507-60655	60591	0.11111	0.19088	54	rbcL
61634-61771	61716	0.11111	0.18381	52	rbcL-accD
59610-59817	59727	0.11067	0.17321	49	atpB-rbcL
62283-62454	62387	0.11067	0.18028	51	accD
61313-61421	61367	0.11022	0.18381	52	rbcL-accD
60067-60175	60121	0.11	0.19442	55	rbcL
60266-60477	60427	0.11	0.19442	55	rbcL
61071-61193	61121	0.11	0.19442	55	rbcL
60978-61095	61029	0.10978	0.19088	54	rbcL
60453-60591	60506	0.10911	0.18735	53	rbcL
128694-129083	128815	0.10889	0.15907	45
60692-60803	60753	0.108	0.19088	54	rbcL
62418-62661	62479	0.108	0.1626	46	accD
60779-60924	60844	0.10756	0.18381	52	rbcL
61584-61716	61633	0.10756	0.17321	49	rbcL-accD
128543-128841	128786	0.10733	0.1626	46
59868-60023	59950	0.10689	0.16967	48	rbcL
60122-60240	60175	0.10667	0.18028	51	rbcL
62167-62387	62282	0.10667	0.17674	50	rbcL-accD
62195-62417	62307	0.10667	0.17674	50	rbcL-accD
128494-128815	128693	0.10667	0.15553	44
60212-60427	60265	0.106	0.18735	53	rbcL
60241-60452	60303	0.106	0.18735	53	rbcL
60428-60535	60477	0.106	0.18735	53	rbcL
60592-60727	60655	0.106	0.18735	53	rbcL
60656-60778	60727	0.106	0.18735	53	rbcL
59677-59842	59760	0.10578	0.1626	46	atpB-rbcL
60804-60977	60871	0.10556	0.18028	51	rbcL
62142-62307	62191	0.10511	0.18028	51	rbcL-accD
59238-59429	59325	0.10489	0.1626	46	atpB-rbcL
62388-62560	62454	0.10489	0.16967	48	accD
60925-61070	61004	0.10378	0.18028	51	rbcL
61258-61396	61338	0.10289	0.16614	47	rbcL
60176-60303	60240	0.10267	0.17321	49	rbcL
61194-61338	61257	0.10222	0.17321	49	rbcL
128787-129226	128841	0.10222	0.152	43
60617-60753	60691	0.102	0.18028	51	rbcL
128842-132222	129226	0.10178	0.14139	40
59951-60091	60023	0.10133	0.17321	49	rbcL
50384-50566	50479	0.10067	0.152	43	trnL-UAA
62455-62686	62560	0.10044	0.15553	44	accD
61122-61257	61193	0.1	0.17674	50	rbcL
60028-60146	60091	0.09956	0.17321	49
62117-62282	62166	0.09933	0.16967	48
50480-50816	50566	0.09911	0.13432	38
60092-60211	60146	0.09867	0.16614	47
60147-60265	60211	0.09867	0.16614	47
61158-61312	61232	0.09867	0.16967	48
61096-61232	61157	0.098	0.17321	49
60872-61029	60977	0.09778	0.16967	48
128816-129332	129083	0.09733	0.152	43
59272-59471	59377	0.09644	0.15907	45
6916-7198	7137	0.09622	0.11665	33
62051-62191	62141	0.09578	0.16614	47
60845-61004	60924	0.09533	0.15907	45
59087-59325	59237	0.09511	0.14493	41
59893-60066	59975	0.09489	0.14846	42
9364-9734	9684	0.09356	0.09191	26
59976-60121	60066	0.09133	0.15553	44
128443-128786	128542	0.09089	0.13786	39
61877-62050	61967	0.09067	0.14139	40
9339-9709	9626	0.08956	0.08484	24
62480-62755	62661	0.08711	0.14139	40
61993-62166	62109	0.08533	0.14493	41
50513-50841	50785	0.08333	0.10958	31
128413-128693	128493	0.08089	0.12019	34
129084-132247	129332	0.08089	0.11665	33
6992-7235	7165	0.08067	0.10251	29
34445-34555	34505	0.07911	0.07777	22
61902-62109	61992	0.07889	0.13079	37
61968-62141	62050	0.07889	0.13079	37
118661-123340	123270	0.07889	0.10251	29
9314-9684	9363	0.07733	0.07423	21
62561-62790	62686	0.07711	0.12372	35
6856-7165	6940	0.076	0.09898	28
34481-34580	34530	0.07556	0.07423	21
123084-123382	123308	0.07533	0.10251	29
34531-34636	34580	0.07378	0.06363	18
59062-59271	59212	0.07356	0.10958	31
118636-123308	123083	0.07311	0.09898	28
34506-34611	34555	0.07267	0.06363	18
50567-50978	50816	0.07267	0.09544	27
128388-128542	128442	0.07089	0.09898	28
78971-79258	79195	0.06978	0.08837	25
6762-7137	6915	0.06844	0.08837	25
78893-79233	79170	0.068	0.09191	26
78135-78241	78184	0.06756	0.07423	21
78868-79195	78970	0.06756	0.08837	25
50359-50512	50414	0.06689	0.10958	31
33826-34198	34020	0.06622	0.0813	23
118611-123270	118660	0.06511	0.08484	24
33859-34223	34173	0.06422	0.07777	22
124338-124514	124397	0.06422	0.0707	20
7171-7291	7235	0.06178	0.06363	18
129227-132272	132222	0.06089	0.0813	23
7138-7265	7198	0.06067	0.07423	21
90464-90727	90579	0.06067	0.07777	22
78160-78305	78216	0.06	0.06716	19
90406-90687	90494	0.05956	0.07777	22
123271-123407	123340	0.05844	0.07777	22
138243-138342	138292	0.05778	0.0813	23
3595-3819	3766	0.05733	0.0707	20
128168-128387	128310	0.05711	0.06363	18
128363-128493	128412	0.05689	0.07423	21
9284-9626	9338	0.05667	0.06009	17
81248-81860	81798	0.056	0.0813	23
137703-137811	137752	0.056	0.06363	18
3429-3794	3669	0.05578	0.0707	20
62662-62815	62755	0.05578	0.09544	27
128311-128442	128387	0.05578	0.06716	19
136282-136405	136343	0.05578	0.08837	25
128206-128412	128362	0.05556	0.06009	17
78089-78216	78159	0.05533	0.06363	18
50817-51055	50978	0.05489	0.07423	21
78732-79170	78892	0.05489	0.0707	20
50786-51030	50841	0.05422	0.07777	22
90381-90579	90463	0.054	0.0707	20
123309-123438	123382	0.054	0.06716	19
136152-136368	136306	0.05378	0.08484	24
124250-124367	124299	0.05356	0.06363	18
124300-124422	124367	0.05356	0.06363	18
138384-138483	138433	0.05333	0.06363	18
31226-31436	31354	0.05311	0.07423	21
81215-81835	81508	0.05311	0.07777	22
9627-9831	9709	0.05289	0.06009	17
79171-79283	79233	0.05244	0.06363	18
33801-34173	33858	0.05222	0.05656	16
123815-123953	123869	0.052	0.05656	16
137728-137836	137786	0.052	0.06363	18
137753-137861	137811	0.05156	0.06009	17
9685-9865	9734	0.05044	0.0707	20
91190-91305	91247	0.05044	0.05656	16
49416-49569	49495	0.05	0.04949	14
3404-3766	3594	0.04978	0.06009	17
128143-128362	128205	0.04978	0.05656	16
31158-31411	31280	0.04933	0.0707	20
138409-138508	138458	0.04933	0.05656	16
31111-31354	31225	0.04911	0.06716	19
64777-64887	64826	0.04889	0.04242	12
138665-138773	138723	0.04867	0.06716	19
138218-138317	138267	0.04844	0.0707	20
64726-64826	64776	0.04778	0.04595	13
34021-34248	34198	0.04733	0.06009	17
50842-51096	51030	0.04733	0.06363	18
77909-78016	77959	0.04733	0.06716	19
79234-79334	79283	0.04733	0.05302	15
48057-48251	48109	0.04711	0.06009	17
9735-9915	9865	0.04689	0.06009	17
136344-136455	136405	0.04689	0.07423	21
49391-49544	49445	0.04644	0.04595	13
9710-9890	9831	0.04622	0.06363	18
124275-124397	124337	0.046	0.05302	15
39187-39336	39284	0.04533	0.05302	15
129333-132297	132247	0.04511	0.05656	16
138268-138383	138317	0.04511	0.06363	18
81509-81885	81835	0.04489	0.06716	19
91165-91272	91222	0.04489	0.04949	14
64802-64912	64851	0.04422	0.03535	10
108646-108843	108724	0.04422	0.05302	15
108671-108876	108770	0.04422	0.05302	15
138434-138533	138483	0.04422	0.05656	16
32153-32288	32212	0.044	0.04242	12
32178-32313	32237	0.044	0.04242	12
48110-48301	48251	0.044	0.05656	16
64752-64851	64801	0.04378	0.03888	11
136307-136430	136368	0.04356	0.07423	21
138609-138723	138664	0.04356	0.06363	18
137071-137170	137120	0.04333	0.06009	17
6737-6940	6855	0.04311	0.05656	16
138343-138458	138408	0.04311	0.05302	15
138640-138748	138698	0.04311	0.06009	17
9832-9940	9890	0.04289	0.05302	15
49446-49600	49544	0.04289	0.04242	12
108902-109037	108951	0.04267	0.04242	12
108927-109062	108994	0.04267	0.04242	12
108952-109088	109037	0.04267	0.04242	12
123341-123463	123407	0.04267	0.05656	16
150251-150387	150301	0.04267	0.04242	12
150277-150412	150326	0.04267	0.04242	12
150302-150437	150387	0.04267	0.04242	12
8408-8534	8465	0.04244	0.04242	12
90354-90494	90405	0.04244	0.05656	16
48013-48147	48084	0.04222	0.04949	14
55246-55375	55298	0.04222	0.06009	17
48085-48276	48147	0.042	0.05302	15
89795-89922	89865	0.042	0.05656	16
79196-79308	79258	0.04178	0.04949	14
50334-50479	50383	0.04156	0.0707	20
96917-97016	96966	0.04156	0.04595	13
162321-162420	162370	0.04156	0.04595	13
123790-123927	123844	0.04133	0.04949	14
128108-128310	128167	0.04133	0.05302	15
7446-7575	7502	0.04111	0.05656	16
8331-8440	8382	0.04089	0.04595	13
134109-134228	134159	0.04089	0.04595	13
108725-108901	108843	0.04067	0.04949	14
138699-138810	138748	0.04067	0.05656	16
150438-150611	150495	0.04067	0.04949	14
150463-150666	150534	0.04067	0.04949	14
150508-150691	150611	0.04067	0.04949	14
6398-6497	6447	0.04044	0.04242	12
7371-7502	7445	0.04044	0.06363	18
32213-32338	32288	0.04044	0.03888	11
90495-90752	90687	0.04044	0.05302	15
52983-55331	55273	0.04022	0.05656	16
78185-78330	78241	0.04022	0.04242	12
138193-138292	138242	0.04022	0.05302	15
96942-97041	96991	0.04	0.04595	13
123740-123844	123789	0.04	0.04949	14
134185-134359	134309	0.04	0.04242	12
162296-162395	162345	0.04	0.04595	13
7421-7550	7470	0.03956	0.05656	16
59028-59237	59086	0.03956	0.06363	18
96892-96991	96941	0.03956	0.04242	12
134134-134309	134184	0.03956	0.03888	11
139492-139627	139541	0.03956	0.05302	15
162346-162445	162395	0.03956	0.04242	12
76241-76350	76290	0.03911	0.04242	12
96867-96966	96916	0.03911	0.03888	11
123765-123869	123814	0.03911	0.04595	13
162371-162470	162420	0.03911	0.03888	11
6574-6679	6623	0.03889	0.04949	14
139036-139141	139091	0.03889	0.03888	11
8281-8382	8330	0.03867	0.04242	12
69151-69250	69200	0.03844	0.03888	11
8383-8509	8440	0.038	0.04242	12
123870-124039	123953	0.038	0.04242	12
138318-138433	138383	0.038	0.04949	14
39241-39361	39311	0.03778	0.04242	12
62687-62840	62790	0.03778	0.06363	18
65377-65488	65438	0.03778	0.04595	13
7199-7316	7265	0.03756	0.03888	11
7266-7370	7316	0.03756	0.04242	12
55274-55400	55331	0.03756	0.04949	14
55299-55426	55375	0.03756	0.04949	14
118094-118193	118143	0.03756	0.02828	8
118119-118218	118168	0.03756	0.02828	8
134160-134334	134228	0.03756	0.03535	10
138584-138698	138639	0.03756	0.05302	15
141119-141218	141168	0.03756	0.02828	8
141144-141243	141193	0.03756	0.02828	8
6448-6548	6497	0.03733	0.04242	12
7236-7341	7291	0.03733	0.03888	11
34917-35016	34966	0.03733	0.04242	12
39162-39311	39240	0.03733	0.03888	11
49496-49772	49569	0.03733	0.03535	10
72503-72609	72558	0.03711	0.04242	12
76216-76325	76265	0.03711	0.03888	11
137678-137786	137727	0.03711	0.03888	11
13930-14068	14007	0.03689	0.03535	10
30567-30741	30618	0.03689	0.04949	14
138293-138408	138342	0.03689	0.05656	16
6473-6573	6522	0.03667	0.04595	13
30619-30801	30741	0.03667	0.04242	12
69797-69896	69846	0.03667	0.03888	11
17851-17953	17900	0.03644	0.03888	11
63372-63471	63421	0.03644	0.03535	10
73609-73710	73659	0.03644	0.04595	13
7342-7470	7420	0.03622	0.05656	16
35319-35419	35369	0.03622	0.03888	11
123928-124064	124014	0.03622	0.04242	12
3379-3669	3428	0.036	0.04595	13
137628-137727	137677	0.036	0.03888	11
137653-137752	137702	0.036	0.03888	11
8306-8407	8357	0.03578	0.04595	13
56727-56856	56794	0.03578	0.04595	13
69608-69716	69666	0.03578	0.04242	12
81190-81798	81247	0.03578	0.05302	15
137046-137145	137095	0.03578	0.04949	14
29713-29819	29762	0.03556	0.04242	12
47926-48084	48012	0.03556	0.04595	13
69772-69871	69821	0.03556	0.03888	11
137787-137886	137836	0.03556	0.04595	13
9184-9283	9233	0.03533	0.03888	11
49830-49938	49886	0.03533	0.03888	11
58932-59061	59002	0.03533	0.04595	13
78051-78184	78134	0.03533	0.04595	13
137096-137195	137145	0.03533	0.04595	13
8983-9082	9032	0.03511	0.04242	12
7317-7445	7370	0.03489	0.05302	15
31281-31461	31411	0.03489	0.04949	14
49773-49886	49829	0.03489	0.03535	10
49798-49913	49861	0.03489	0.03535	10
50979-51121	51055	0.03489	0.04949	14
30336-30466	30392	0.03467	0.04595	13
34886-34991	34941	0.03467	0.03888	11
65327-65438	65376	0.03467	0.04242	12
87396-87549	87475	0.03467	0.05656	16
123845-124014	123927	0.03467	0.03888	11
137578-137677	137627	0.03467	0.03888	11
138724-138835	138773	0.03467	0.04595	13
6599-6706	6649	0.03444	0.04242	12
63397-63496	63446	0.03444	0.03181	9
72472-72583	72532	0.03444	0.04242	12
15315-15419	15364	0.03422	0.04242	12
56702-56831	56751	0.03422	0.04595	13
91223-91341	91272	0.03422	0.03888	11
31083-31280	31157	0.034	0.04949	14
55588-55712	55637	0.034	0.03888	11
89770-89892	89819	0.034	0.04242	12
118144-118243	118193	0.034	0.02474	7
139517-139652	139566	0.034	0.04595	13
141094-141193	141143	0.034	0.02474	7
15290-15389	15339	0.03378	0.03888	11
69583-69691	69632	0.03378	0.03888	11
123954-124089	124039	0.03378	0.03888	11
124015-124114	124064	0.03378	0.03888	11
32238-32363	32313	0.03356	0.03535	10
126067-127074	126582	0.03356	0.05656	16
138118-138217	138167	0.03356	0.04595	13
8441-8559	8509	0.03333	0.03535	10
29221-29575	29283	0.03333	0.03888	11
34942-35041	34991	0.03333	0.03535	10
58907-59027	58977	0.03333	0.04242	12
139192-139291	139241	0.03333	0.04595	13
139217-139316	139266	0.03333	0.04595	13
65352-65463	65401	0.03311	0.04242	12
69633-69746	69691	0.03311	0.04242	12
72533-72634	72583	0.03311	0.03535	10
124065-124166	124114	0.03311	0.03888	11
126041-127049	126091	0.03311	0.05302	15
6624-6736	6679	0.03289	0.04242	12
13905-14032	13971	0.03289	0.02828	8
17826-17928	17875	0.03289	0.03535	10
73660-73761	73710	0.03289	0.03535	10
81799-81910	81860	0.03289	0.04595	13
138986-139091	139035	0.03289	0.03888	11
4642-4755	4705	0.03267	0.04949	14
15252-15364	15314	0.03267	0.03888	11
16776-16886	16836	0.03267	0.03535	10
30068-30169	30119	0.03267	0.05302	15
118586-123083	118635	0.03267	0.04595	13
126615-127128	127074	0.03267	0.05302	15
138749-138860	138810	0.03267	0.04242	12
29683-29787	29737	0.03244	0.04242	12
32314-32445	32363	0.03244	0.03888	11
135422-135521	135471	0.03244	0.03535	10
6373-6472	6422	0.03222	0.03535	10
64938-65046	64987	0.03222	0.04949	14
73634-73735	73685	0.03222	0.03888	11
124368-124543	124422	0.03222	0.04242	12
124398-124568	124514	0.03222	0.04242	12
6498-6598	6548	0.032	0.04242	12
55533-55637	55587	0.032	0.03535	10
87675-87777	87727	0.032	0.04595	13
89820-89975	89892	0.032	0.04595	13
118169-118268	118218	0.032	0.02121	6
141069-141168	141118	0.032	0.02121	6
4831-4989	4914	0.03156	0.04242	12
35345-35444	35394	0.03156	0.03535	10
52155-52267	52211	0.03156	0.03535	10
87700-87802	87752	0.03156	0.04242	12
126092-127103	127049	0.03156	0.05302	15
133253-133357	133302	0.03156	0.03888	11
136796-136895	136845	0.03156	0.04242	12
138143-138242	138192	0.03156	0.04242	12
3670-3844	3794	0.03133	0.04242	12
30517-30618	30566	0.03133	0.04242	12
38098-38221	38161	0.03133	0.03888	11
38123-38259	38195	0.03133	0.03888	11
51604-51718	51665	0.03133	0.03535	10
58882-59002	58931	0.03133	0.03888	11
72961-73089	73020	0.03133	0.04242	12
73686-73786	73735	0.03133	0.03181	9
77960-78088	78016	0.03133	0.03888	11
8628-8740	8687	0.03111	0.04242	12
34850-34966	34916	0.03111	0.03535	10
52130-52236	52180	0.03111	0.03181	9
139467-139566	139516	0.03111	0.03888	11
4350-4491	4410	0.03089	0.04595	13
7292-7420	7341	0.03089	0.04595	13
29658-29762	29712	0.03089	0.04242	12
29738-29853	29787	0.03089	0.03888	11
91139-91247	91189	0.03089	0.03888	11
137121-137232	137170	0.03089	0.03888	11
35294-35394	35343	0.03067	0.03181	9
69126-69225	69175	0.03067	0.03535	10
69201-69301	69250	0.03067	0.03181	9
71957-72061	72006	0.03067	0.04242	12
71982-72086	72036	0.03067	0.04242	12
87371-87524	87426	0.03067	0.04949	14
139011-139116	139060	0.03067	0.03535	10
8358-8465	8407	0.03022	0.03888	11
32128-32237	32177	0.03022	0.03181	9
134694-134810	134747	0.03022	0.03181	9
136127-136343	136281	0.03022	0.04595	13
138093-138192	138142	0.03022	0.04595	13
35370-35522	35419	0.03	0.03535	10
51578-51690	51628	0.03	0.03535	10
55563-55662	55612	0.03	0.03181	9
65464-65563	65513	0.03	0.03888	11
87427-87574	87524	0.03	0.05302	15
103672-103773	103721	0.03	0.05302	15
139542-139677	139627	0.03	0.03888	11
155564-155665	155615	0.03	0.05302	15
6423-6522	6472	0.02978	0.03181	9
8466-8602	8534	0.02978	0.03181	9
30592-30776	30716	0.02978	0.04242	12
30717-30826	30776	0.02956	0.03535	10
34395-34505	34444	0.02956	0.04949	14
63347-63446	63396	0.02956	0.03181	9
125900-126012	125953	0.02956	0.04949	14
133228-133327	133277	0.02956	0.03535	10
6650-6761	6706	0.02933	0.03888	11
7526-7625	7575	0.02933	0.03888	11
17801-17900	17850	0.02933	0.03181	9
29259-29600	29330	0.02933	0.03181	9
47664-47775	47717	0.02933	0.03535	10
51553-51665	51602	0.02933	0.03535	10
62916-63021	62971	0.02933	0.03888	11
62972-63071	63021	0.02933	0.03888	11
77935-78050	77991	0.02933	0.03535	10
124040-124139	124089	0.02933	0.03535	10
139167-139266	139216	0.02933	0.03888	11
8256-8357	8305	0.02911	0.02828	8
55508-55612	55562	0.02911	0.03181	9
91248-91366	91305	0.02911	0.03181	9
137603-137702	137652	0.02911	0.03181	9
29763-29892	29819	0.02889	0.03535	10
30361-30491	30418	0.02889	0.03888	11
32339-32470	32388	0.02889	0.03535	10
47901-48056	47983	0.02889	0.03888	11
135372-135471	135421	0.02889	0.03181	9
135397-135496	135446	0.02889	0.03181	9
138961-139060	139010	0.02889	0.03181	9
4806-4964	4855	0.02867	0.03535	10
30094-30202	30144	0.02867	0.04595	13
33211-33335	33273	0.02867	0.03535	10
48148-48326	48276	0.02867	0.04242	12
68999-69100	69048	0.02867	0.03181	9
136656-136770	136720	0.02867	0.04242	12
138168-138267	138217	0.02867	0.03535	10
7471-7600	7550	0.02844	0.03888	11
44688-44787	44737	0.02844	0.02828	8
76191-76290	76240	0.02844	0.03535	10
76266-76375	76325	0.02844	0.02828	8
79259-79359	79308	0.02844	0.03181	9
108877-108994	108926	0.02844	0.02828	8
124115-124216	124166	0.02844	0.03888	11
150327-150462	150412	0.02844	0.02828	8
56752-56881	56831	0.02822	0.03535	10
132398-132497	132447	0.02822	0.03888	11
132626-132728	132675	0.02822	0.04242	12
136846-136945	136895	0.02822	0.04242	12
136871-136970	136920	0.02822	0.04242	12
137233-137341	137291	0.02822	0.03888	11
1639-1743	1688	0.028	0.03888	11
7551-7650	7600	0.028	0.03888	11
10249-10377	10324	0.028	0.03888	11
39527-39629	39579	0.028	0.03888	11
73711-73820	73761	0.028	0.03181	9
103697-103798	103746	0.028	0.04949	14
155539-155640	155590	0.028	0.04949	14
6523-6623	6573	0.02778	0.03535	10
17876-17978	17928	0.02778	0.02828	8
49862-49963	49913	0.02778	0.02828	8
52105-52211	52154	0.02778	0.03181	9
69553-69666	69607	0.02778	0.02828	8
72559-72659	72609	0.02778	0.03181	9
81165-81508	81214	0.02778	0.03888	11
132575-132675	132625	0.02778	0.03535	10
4325-4462	4385	0.02756	0.03535	10
6348-6447	6397	0.02756	0.03181	9
9234-9338	9283	0.02756	0.03535	10
15657-15786	15716	0.02756	0.03535	10
30419-30541	30491	0.02756	0.03181	9
50301-50414	50358	0.02756	0.04595	13
69075-69175	69125	0.02756	0.03181	9
73533-73633	73582	0.02756	0.03535	10
92444-92592	92493	0.02756	0.03888	11
133164-133302	133252	0.02756	0.03181	9
135622-135721	135671	0.02756	0.04595	13
138068-138167	138117	0.02756	0.04595	13
150535-150716	150666	0.02756	0.03181	9
8663-8773	8715	0.02733	0.03888	11
9159-9258	9208	0.02733	0.02474	7
15365-15469	15419	0.02733	0.03535	10
32681-32786	32736	0.02733	0.03535	10
51523-51628	51577	0.02733	0.03181	9
55613-55737	55662	0.02733	0.03181	9
58857-58977	58906	0.02733	0.03181	9
62947-63046	62996	0.02733	0.03535	10
65297-65401	65351	0.02733	0.03535	10
65489-65601	65538	0.02733	0.03888	11
65514-65626	65563	0.02733	0.03888	11
68894-68998	68948	0.02733	0.03181	9
71016-71731	71072	0.02733	0.04242	12
72936-73064	72985	0.02733	0.03535	10
139417-139516	139466	0.02733	0.03535	10
5946-6047	5995	0.02711	0.03181	9
10198-10324	10248	0.02711	0.03535	10
15227-15339	15289	0.02711	0.03181	9
16751-16861	16807	0.02711	0.02828	8
16862-16962	16911	0.02711	0.03535	10
34420-34530	34469	0.02711	0.04242	12
68974-69073	69023	0.02711	0.03181	9
73583-73685	73633	0.02711	0.03535	10
77865-77991	77934	0.02711	0.04242	12
111780-111879	111829	0.02711	0.04242	12
125954-126066	126012	0.02711	0.04242	12
135772-135976	135839	0.02711	0.04242	12
135797-136001	135864	0.02711	0.04242	12
147460-147559	147509	0.02711	0.04242	12
5126-5226	5175	0.02689	0.02828	8
8955-9057	9007	0.02689	0.03535	10
9008-9108	9057	0.02689	0.03535	10
47984-48109	48056	0.02689	0.03535	10
62791-62890	62840	0.02689	0.03888	11
78217-78355	78305	0.02689	0.03181	9
90580-90777	90727	0.02689	0.03535	10
1-163	98	0.02667	0.02828	8
30043-30144	30093	0.02667	0.04242	12
38073-38195	38122	0.02667	0.03535	10
55332-55452	55400	0.02667	0.03888	11
88556-88657	88605	0.02667	0.03888	11
89745-89865	89794	0.02667	0.03535	10
123383-123488	123438	0.02667	0.02828	8
125254-125371	125321	0.02667	0.03888	11
133278-133382	133327	0.02667	0.03888	11
136631-136745	136695	0.02667	0.03888	11
1314-1448	1372	0.02644	0.02828	8
55453-55562	55507	0.02644	0.03181	9
55478-55587	55532	0.02644	0.03181	9
63422-63521	63471	0.02644	0.02474	7
67672-67793	67742	0.02644	0.03888	11
125842-125953	125899	0.02644	0.03535	10
1664-1775	1718	0.02622	0.03888	11
29626-29737	29682	0.02622	0.03888	11
30542-30716	30591	0.02622	0.03535	10
48902-49011	48952	0.02622	0.03888	11
66822-66921	66871	0.02622	0.03535	10
77992-78134	78050	0.02622	0.03535	10
124217-124337	124274	0.02622	0.03888	11
132373-132472	132422	0.02622	0.03535	10
136821-136920	136870	0.02622	0.03888	11
140227-140326	140276	0.02622	0.03181	9
140252-140351	140301	0.02622	0.03181	9
19314-19413	19363	0.026	0.02828	8
30145-30252	30202	0.026	0.04595	13
39137-39284	39186	0.026	0.02828	8
65402-65513	65463	0.026	0.03535	10
68819-68918	68868	0.026	0.03535	10
69176-69275	69225	0.026	0.02828	8
124140-124249	124191	0.026	0.03535	10
132836-132936	132886	0.026	0.03181	9
15340-15444	15389	0.02578	0.03535	10
51056-51171	51121	0.02578	0.03535	10
51097-51196	51146	0.02578	0.03535	10
52436-52615	52565	0.02578	0.03181	9
68919-69023	68973	0.02578	0.02828	8
124167-124274	124216	0.02578	0.03535	10
132550-132650	132599	0.02578	0.03181	9
137912-138017	137967	0.02578	0.03535	10
138459-138558	138508	0.02578	0.03535	10
1689-1800	1743	0.02556	0.04242	12
4856-5014	4964	0.02556	0.03181	9
5920-6022	5970	0.02556	0.03181	9
9209-9313	9258	0.02556	0.03181	9
13972-14093	14032	0.02556	0.03181	9
34174-34273	34223	0.02556	0.04242	12
44880-45027	44948	0.02556	0.03181	9
64963-65071	65021	0.02556	0.04242	12
87728-87827	87777	0.02556	0.03181	9
92469-92617	92526	0.02556	0.03535	10
111730-111829	111779	0.02556	0.04242	12
111755-111854	111804	0.02556	0.04242	12
125929-126040	125978	0.02556	0.04242	12
133328-133432	133382	0.02556	0.04242	12
147510-147609	147559	0.02556	0.04242	12
29284-29625	29575	0.02533	0.02474	7
30492-30591	30541	0.02533	0.03181	9
47639-47750	47688	0.02533	0.02828	8
49012-49151	49101	0.02533	0.03181	9
49077-49188	49126	0.02533	0.03181	9
72986-73114	73064	0.02533	0.03181	9
73444-73557	73507	0.02533	0.03181	9
88708-88844	88793	0.02533	0.02828	8
125204-125321	125253	0.02533	0.03181	9
4617-4730	4666	0.02511	0.03888	11
16808-16911	16861	0.02511	0.02474	7
66398-66760	66710	0.02511	0.03888	11
88581-88682	88632	0.02511	0.03888	11
88606-88707	88657	0.02511	0.03888	11
125792-125899	125841	0.02511	0.02828	8
125875-125978	125928	0.02511	0.03888	11
125979-126091	126040	0.02511	0.03888	11
4386-4516	4462	0.02489	0.03535	10
30203-30302	30252	0.02489	0.03535	10
44652-44762	44712	0.02489	0.02474	7
90072-90191	90141	0.02489	0.03181	9
125697-125816	125766	0.02489	0.03181	9
125722-125841	125791	0.02489	0.03181	9
128082-128205	128142	0.02489	0.03535	10
136381-136480	136430	0.02489	0.03535	10
136431-136530	136480	0.02489	0.03535	10
137837-137942	137886	0.02489	0.02828	8
138774-138885	138835	0.02489	0.02828	8
16837-16937	16886	0.02467	0.02828	8
30018-30119	30067	0.02467	0.03888	11
33274-33385	33335	0.02467	0.03888	11
56446-56551	56496	0.02467	0.03535	10
56472-56576	56526	0.02467	0.03535	10
71932-72036	71981	0.02467	0.03181	9
124423-124593	124543	0.02467	0.03181	9
125297-125396	125346	0.02467	0.03535	10
132223-132322	132272	0.02467	0.03888	11
132248-132347	132297	0.02467	0.03888	11
136606-136720	136655	0.02467	0.03535	10
10158-10295	10223	0.02444	0.03535	10
32787-32890	32836	0.02444	0.02828	8
32812-32915	32861	0.02444	0.02828	8
47614-47717	47663	0.02444	0.02828	8
64852-64962	64912	0.02444	0.02828	8
67697-67818	67768	0.02444	0.03535	10
73558-73659	73608	0.02444	0.03535	10
76166-76265	76215	0.02444	0.02828	8
132811-132911	132860	0.02444	0.03181	9
135447-135546	135496	0.02444	0.03181	9
139061-139166	139116	0.02444	0.02474	7
5717-5819	5769	0.02422	0.03181	9
5742-5844	5794	0.02422	0.03181	9
6549-6649	6598	0.02422	0.03181	9
8688-8800	8740	0.02422	0.03535	10
9033-9133	9082	0.02422	0.03535	10
9058-9158	9108	0.02422	0.03535	10
32364-32495	32445	0.02422	0.03181	9
32389-32520	32470	0.02422	0.03181	9
32706-32811	32761	0.02422	0.03535	10
52323-52565	52399	0.02422	0.03181	9
64426-64531	64480	0.02422	0.03535	10
75375-75482	75431	0.02422	0.02828	8
91114-91222	91164	0.02422	0.03181	9
127453-127556	127506	0.02422	0.02828	8
132348-132447	132397	0.02422	0.03181	9
132887-132986	132936	0.02422	0.02828	8
137146-137257	137195	0.02422	0.03181	9
137196-137316	137257	0.02422	0.03181	9
140277-140376	140326	0.02422	0.02828	8
1606-1718	1663	0.024	0.03181	9
6323-6422	6372	0.024	0.02828	8
16726-16836	16775	0.024	0.02828	8
19289-19388	19338	0.024	0.02474	7
19339-19438	19388	0.024	0.02474	7
30120-30227	30169	0.024	0.04242	12
34332-34444	34394	0.024	0.04242	12
68844-68948	68893	0.024	0.03181	9
69101-69200	69150	0.024	0.02828	8
82913-83016	82962	0.024	0.02828	8
82938-83041	82987	0.024	0.02828	8
108621-108770	108670	0.024	0.02828	8
134229-134384	134334	0.024	0.03181	9
139092-139191	139141	0.024	0.02121	6
32762-32861	32811	0.02378	0.03181	9
32862-32965	32915	0.02378	0.03181	9
44839-44983	44923	0.02378	0.03181	9
52461-52640	52590	0.02378	0.02828	8
62756-62865	62815	0.02378	0.03888	11
66232-66338	66288	0.02378	0.03181	9
68949-69048	68998	0.02378	0.02474	7
74584-74691	74634	0.02378	0.02828	8
82963-83066	83016	0.02378	0.02828	8
88683-88819	88732	0.02378	0.02828	8
90008-90141	90071	0.02378	0.03181	9
90047-90166	90116	0.02378	0.03181	9
124192-124299	124249	0.02378	0.03181	9
137887-137992	137942	0.02378	0.03181	9
139392-139491	139441	0.02378	0.03181	9
139442-139541	139491	0.02378	0.03181	9
1719-1825	1775	0.02356	0.03888	11
16887-16987	16937	0.02356	0.03181	9
29196-29330	29258	0.02356	0.03181	9
34249-34362	34298	0.02356	0.03888	11
44924-45052	44983	0.02356	0.02828	8
51853-51952	51902	0.02356	0.02828	8
133303-133407	133357	0.02356	0.03888	11
134748-134874	134810	0.02356	0.02474	7
135597-135696	135646	0.02356	0.03888	11
147485-147584	147534	0.02356	0.03888	11
17776-17875	17825	0.02333	0.03181	9
29331-29657	29600	0.02333	0.02828	8
29788-29917	29853	0.02333	0.02828	8
30303-30418	30360	0.02333	0.03535	10
32631-32736	32680	0.02333	0.02828	8
33243-33360	33310	0.02333	0.03181	9
39502-39604	39554	0.02333	0.03535	10
49366-49495	49415	0.02333	0.02828	8
51031-51146	51096	0.02333	0.03181	9
51372-51497	51447	0.02333	0.02828	8
52958-55298	55245	0.02333	0.03535	10
68869-68973	68918	0.02333	0.02474	7
69717-69821	69771	0.02333	0.02474	7
69747-69846	69796	0.02333	0.02474	7
70985-71098	71047	0.02333	0.03535	10
72287-72396	72341	0.02333	0.02474	7
72317-72421	72366	0.02333	0.02474	7
72342-72446	72396	0.02333	0.02474	7
73021-73139	73089	0.02333	0.02828	8
136746-136845	136795	0.02333	0.03535	10
4592-4705	4641	0.02311	0.03535	10
66264-66363	66313	0.02311	0.03535	10
132785-132886	132835	0.02311	0.03535	10
133696-133803	133753	0.02311	0.03181	9
135472-135571	135521	0.02311	0.03535	10
135722-135839	135771	0.02311	0.03535	10
135747-135864	135796	0.02311	0.03535	10
136481-136580	136530	0.02311	0.03181	9
136506-136605	136555	0.02311	0.03181	9
4915-5039	4989	0.02289	0.03181	9
8930-9032	8982	0.02289	0.02828	8
13880-14007	13929	0.02289	0.02121	6
30393-30516	30466	0.02289	0.02828	8
33776-34020	33825	0.02289	0.02828	8
89866-90007	89922	0.02289	0.03181	9
124594-124753	124700	0.02289	0.02828	8
136771-136870	136820	0.02289	0.03181	9
30278-30392	30335	0.02267	0.02828	8
47689-47800	47750	0.02267	0.02828	8
55376-55477	55426	0.02267	0.03181	9
56677-56794	56726	0.02267	0.03181	9
66314-66422	66363	0.02267	0.03181	9
66364-66735	66422	0.02267	0.03181	9
66786-66896	66846	0.02267	0.03181	9
78707-78970	78867	0.02267	0.03181	9
123715-123814	123764	0.02267	0.03181	9
126013-126582	126066	0.02267	0.03181	9
132273-132372	132322	0.02267	0.03535	10
132861-132961	132911	0.02267	0.02828	8
133671-133778	133720	0.02267	0.02828	8
139242-139341	139291	0.02267	0.03181	9
139567-139702	139652	0.02267	0.03181	9
5971-6072	6022	0.02244	0.02828	8
7576-7675	7625	0.02244	0.03181	9
7601-7700	7650	0.02244	0.03181	9
8603-8715	8662	0.02244	0.03181	9
10224-10349	10295	0.02244	0.03181	9
10556-10655	10605	0.02244	0.02828	8
51629-51752	51690	0.02244	0.02828	8
51666-51777	51718	0.02244	0.02828	8
67743-67843	67793	0.02244	0.03181	9
73736-73845	73786	0.02244	0.02474	7
32737-32836	32786	0.02222	0.03181	9
52366-52590	52460	0.02222	0.02828	8
66207-66313	66263	0.02222	0.03181	9
81140-81247	81189	0.02222	0.03181	9
84096-84204	84154	0.02222	0.03181	9
84130-84229	84179	0.02222	0.03181	9
85722-85838	85781	0.02222	0.03181	9
85757-85870	85813	0.02222	0.03181	9
85782-85895	85838	0.02222	0.03181	9
140202-140301	140251	0.02222	0.02474	7
10478-10580	10530	0.022	0.02828	8
15578-15716	15656	0.022	0.02828	8
17713-17825	17775	0.022	0.03888	11
34299-34419	34362	0.022	0.03888	11
34687-34799	34737	0.022	0.03888	11
46866-46972	46915	0.022	0.02474	7
46891-46997	46940	0.022	0.02474	7
64701-64801	64751	0.022	0.02828	8
69226-69326	69275	0.022	0.02121	6
127179-127295	127236	0.022	0.03888	11
127396-127506	127452	0.022	0.02474	7
147535-147634	147584	0.022	0.03888	11
9109-9208	9158	0.02178	0.02828	8
28684-29126	28740	0.02178	0.02828	8
32837-32940	32890	0.02178	0.02828	8
74609-74716	74665	0.02178	0.02474	7
75911-76015	75960	0.02178	0.02828	8
84180-84279	84229	0.02178	0.02828	8
125647-125766	125696	0.02178	0.02828	8
5151-5251	5200	0.02156	0.02474	7
14008-14118	14068	0.02156	0.02474	7
16912-17012	16962	0.02156	0.02828	8
31562-31700	31642	0.02156	0.03535	10
34370-34469	34419	0.02156	0.03535	10
34662-34774	34711	0.02156	0.03535	10
44949-45077	45027	0.02156	0.02474	7
64988-65096	65046	0.02156	0.03535	10
71048-71756	71098	0.02156	0.03535	10
77815-77934	77864	0.02156	0.03535	10
125767-125874	125816	0.02156	0.02474	7
132701-132810	132753	0.02156	0.03535	10
133754-133853	133803	0.02156	0.03535	10
134719-134835	134784	0.02156	0.02121	6
135347-135446	135396	0.02156	0.02474	7
136696-136795	136745	0.02156	0.03535	10
137021-137120	137070	0.02156	0.03181	9
1289-1403	1338	0.02133	0.02474	7
4781-4914	4830	0.02133	0.02828	8
14033-14160	14093	0.02133	0.03181	9
14219-14326	14268	0.02133	0.02828	8
15420-15519	15469	0.02133	0.02474	7
38162-38284	38221	0.02133	0.02121	6
39285-39386	39336	0.02133	0.02828	8
49601-49861	49797	0.02133	0.02474	7
65439-65538	65488	0.02133	0.02828	8
72836-72935	72885	0.02133	0.03181	9
87650-87752	87699	0.02133	0.03181	9
132962-133061	133011	0.02133	0.02474	7
133721-133828	133778	0.02133	0.03181	9
136721-136820	136770	0.02133	0.03181	9
7986-8105	8035	0.02111	0.02828	8
14119-14243	14185	0.02111	0.02474	7
19939-20038	19988	0.02111	0.02828	8
31512-31642	31561	0.02111	0.03181	9
56795-56906	56856	0.02111	0.02828	8
62816-62915	62865	0.02111	0.03181	9
62841-62946	62890	0.02111	0.03181	9
72007-72111	72061	0.02111	0.02828	8
88633-88732	88682	0.02111	0.03181	9
132754-132860	132810	0.02111	0.03181	9
133904-134008	133953	0.02111	0.02828	8
133929-134033	133982	0.02111	0.02828	8
133954-134058	134008	0.02111	0.02828	8
135497-135596	135546	0.02111	0.03181	9
30742-30851	30801	0.02089	0.02474	7
48987-49126	49036	0.02089	0.02474	7
52181-52292	52236	0.02089	0.02828	8
52932-55273	52982	0.02089	0.02828	8
69822-69921	69871	0.02089	0.02474	7
124090-124191	124139	0.02089	0.02828	8
134084-134184	134133	0.02089	0.02828	8
134669-134784	134718	0.02089	0.02474	7
136406-136505	136455	0.02089	0.02828	8
9866-10082	9915	0.02067	0.02121	6
15390-15494	15444	0.02067	0.02828	8
48953-49101	49011	0.02067	0.03181	9
62891-62996	62946	0.02067	0.02828	8
65539-65651	65601	0.02067	0.03181	9
82513-82612	82562	0.02067	0.03181	9
83846-83945	83895	0.02067	0.03181	9
86671-86770	86720	0.02067	0.01767	5
89976-90116	90046	0.02067	0.02828	8
127050-127153	127103	0.02067	0.03181	9
127104-127211	127153	0.02067	0.03181	9
136456-136555	136505	0.02067	0.02474	7
137171-137291	137232	0.02067	0.02828	8
137258-137366	137316	0.02067	0.02828	8
137812-137911	137861	0.02067	0.02828	8
5996-6097	6047	0.02044	0.02474	7
17901-18004	17953	0.02044	0.02121	6
88078-88180	88129	0.02044	0.02474	7
88103-88205	88155	0.02044	0.02474	7
88130-88230	88180	0.02044	0.02474	7
91392-91491	91441	0.02044	0.02828	8
125817-125928	125874	0.02044	0.02474	7
132937-133036	132986	0.02044	0.02474	7
3767-3869	3819	0.02022	0.02828	8
4300-4410	4349	0.02022	0.02828	8
7936-8035	7985	0.02022	0.02474	7
8716-8829	8773	0.02022	0.02828	8
9891-10107	9940	0.02022	0.02828	8
15742-15875	15821	0.02022	0.02828	8
34825-34941	34885	0.02022	0.02828	8
35623-35722	35672	0.02022	0.02474	7
38360-38476	38411	0.02022	0.02828	8
38385-38501	38443	0.02022	0.02828	8
52080-52180	52129	0.02022	0.02121	6
55427-55532	55477	0.02022	0.02828	8
64359-64480	64425	0.02022	0.02828	8
66177-66288	66231	0.02022	0.02828	8
69049-69150	69100	0.02022	0.02828	8
73787-73895	73845	0.02022	0.02828	8
74559-74665	74608	0.02022	0.02474	7
75335-75457	75399	0.02022	0.02121	6
75400-75508	75457	0.02022	0.02121	6
82992-83092	83041	0.02022	0.02474	7
108805-108926	108876	0.02022	0.02474	7
125572-125671	125621	0.02022	0.02828	8
127421-127531	127481	0.02022	0.02474	7
132600-132700	132650	0.02022	0.02828	8
1339-1479	1403	0.02	0.02121	6
1373-1504	1448	0.02	0.02121	6
1581-1688	1638	0.02	0.02474	7
3004-3103	3053	0.02	0.02121	6
10531-10630	10580	0.02	0.02474	7
15546-15681	15631	0.02	0.02474	7
15632-15741	15681	0.02	0.02474	7
17688-17800	17750	0.02	0.03535	10
19364-19463	19413	0.02	0.02474	7
30170-30277	30227	0.02	0.03535	10
46841-46940	46890	0.02	0.02121	6
48327-48426	48376	0.02	0.03535	10
48352-48451	48401	0.02	0.03535	10
82588-82687	82637	0.02	0.02121	6
111705-111804	111754	0.02	0.03535	10
127154-127270	127211	0.02	0.03535	10
127371-127481	127420	0.02	0.02121	6
135547-135646	135596	0.02	0.03535	10
10631-10730	10680	0.01978	0.02474	7
44738-44838	44787	0.01978	0.02474	7
64626-64725	64675	0.01978	0.02474	7
65172-65271	65221	0.01978	0.01767	5
65197-65296	65246	0.01978	0.01767	5
70831-70943	70880	0.01978	0.02474	7
73762-73870	73820	0.01978	0.02474	7
84881-84980	84930	0.01978	0.03181	9
84906-85013	84955	0.01978	0.03181	9
84931-85046	84980	0.01978	0.03181	9
88733-88869	88819	0.01978	0.02121	6
137862-137967	137911	0.01978	0.02474	7
1744-1850	1800	0.01956	0.03181	9
4667-4780	4730	0.01956	0.03181	9
5176-5276	5226	0.01956	0.02121	6
6223-6322	6272	0.01956	0.03181	9
10781-10880	10830	0.01956	0.03181	9
29601-29712	29657	0.01956	0.03181	9
34637-34737	34686	0.01956	0.03181	9
45053-45152	45102	0.01956	0.03181	9
48877-48986	48927	0.01956	0.03181	9
49964-50089	50025	0.01956	0.03181	9
49989-50123	50055	0.01956	0.03181	9
62997-63096	63046	0.01956	0.02121	6
65022-65121	65071	0.01956	0.03181	9
66423-66785	66735	0.01956	0.03181	9
90329-90463	90380	0.01956	0.03181	9
91005-91113	91054	0.01956	0.02121	6
92494-92642	92592	0.01956	0.02474	7
92527-92667	92617	0.01956	0.02474	7
133358-133457	133407	0.01956	0.03181	9
133779-133878	133828	0.01956	0.03181	9
135647-135746	135696	0.01956	0.03181	9
139367-139466	139416	0.01956	0.03181	9
155616-155715	155665	0.01956	0.03181	9
4411-4541	4491	0.01933	0.02828	8
7726-7825	7775	0.01933	0.02474	7
13855-13971	13904	0.01933	0.01767	5
15445-15545	15494	0.01933	0.02121	6
28659-28772	28715	0.01933	0.02121	6
32656-32761	32705	0.01933	0.02121	6
34581-34686	34636	0.01933	0.02121	6
44602-44712	44651	0.01933	0.01767	5
49102-49213	49151	0.01933	0.02121	6
51423-51522	51472	0.01933	0.02121	6
64888-64987	64937	0.01933	0.02474	7
72760-72860	72809	0.01933	0.02828	8
72785-72885	72834	0.01933	0.02828	8
72810-72910	72860	0.01933	0.02828	8
85814-85920	85870	0.01933	0.02474	7
90688-90802	90752	0.01933	0.02474	7
133012-133138	133061	0.01933	0.02121	6
134034-134133	134083	0.01933	0.02828	8
134059-134159	134108	0.01933	0.02828	8
134785-134912	134835	0.01933	0.02474	7
50-188	138	0.01911	0.02121	6
5478-5586	5527	0.01911	0.02828	8
5528-5641	5586	0.01911	0.02828	8
19914-20013	19963	0.01911	0.02474	7
32546-32655	32605	0.01911	0.02828	8
51691-51802	51752	0.01911	0.02828	8
65247-65351	65296	0.01911	0.02474	7
66289-66394	66338	0.01911	0.02828	8
66339-66710	66394	0.01911	0.02828	8
66736-66846	66785	0.01911	0.02828	8
66847-66946	66896	0.01911	0.02828	8
88531-88632	88580	0.01911	0.02828	8
88658-88793	88707	0.01911	0.02474	7
108085-108195	108135	0.01911	0.02474	7
108110-108220	108170	0.01911	0.02474	7
125229-125346	125287	0.01911	0.02828	8
136531-136630	136580	0.01911	0.02474	7
137317-137416	137366	0.01911	0.02828	8
24014-24114	24063	0.01889	0.02121	6
24621-24720	24670	0.01889	0.02474	7
69847-69946	69896	0.01889	0.02121	6
72447-72558	72502	0.01889	0.02474	7
83321-83420	83370	0.01889	0.02474	7
85896-85995	85945	0.01889	0.02121	6
132912-133011	132961	0.01889	0.02474	7
3845-4020	3907	0.01867	0.02828	8
4121-4224	4174	0.01867	0.02828	8
4150-4249	4199	0.01867	0.02828	8
6682-6855	6736	0.01867	0.02828	8
32103-32212	32152	0.01867	0.02474	7
33311-33410	33360	0.01867	0.02828	8
35118-35217	35167	0.01867	0.02474	7
39555-39654	39604	0.01867	0.02828	8
63122-63221	63171	0.01867	0.02474	7
65222-65326	65271	0.01867	0.02121	6
66761-66871	66821	0.01867	0.02474	7
67769-67868	67818	0.01867	0.02828	8
73483-73582	73532	0.01867	0.02474	7
81961-82062	82011	0.01867	0.02474	7
81986-82087	82036	0.01867	0.02474	7
86071-86170	86120	0.01867	0.02828	8
87346-87475	87395	0.01867	0.02828	8
88331-88430	88380	0.01867	0.02474	7
125522-125621	125571	0.01867	0.02828	8
133646-133753	133695	0.01867	0.02121	6
137292-137391	137341	0.01867	0.02474	7
137467-137602	137516	0.01867	0.02121	6
3029-3128	3078	0.01844	0.02121	6
3054-3153	3103	0.01844	0.02121	6
8560-8687	8627	0.01844	0.02474	7
34967-35067	35016	0.01844	0.02121	6
46916-47022	46972	0.01844	0.02121	6
51903-52002	51952	0.01844	0.01414	4
4731-4830	4780	0.01822	0.02474	7
7911-8010	7960	0.01822	0.02121	6
8905-9007	8954	0.01822	0.02474	7
10296-10402	10349	0.01822	0.02474	7
15495-15631	15545	0.01822	0.02474	7
34612-34711	34661	0.01822	0.02474	7
35548-35647	35597	0.01822	0.02474	7
51828-51927	51877	0.01822	0.02474	7
64385-64506	64450	0.01822	0.02474	7
64651-64751	64700	0.01822	0.02474	7
69024-69125	69073	0.01822	0.02474	7
73383-73507	73443	0.01822	0.02474	7
73408-73532	73482	0.01822	0.02474	7
76634-76751	76686	0.01822	0.02474	7
84155-84254	84204	0.01822	0.02474	7
85871-85970	85920	0.01822	0.02474	7
87753-87852	87802	0.01822	0.02474	7
123664-123764	123714	0.01822	0.02121	6
125672-125791	125721	0.01822	0.02474	7
132323-132422	132372	0.01822	0.02121	6
136102-136306	136151	0.01822	0.02474	7
1776-1875	1825	0.018	0.03181	9
3908-4070	4020	0.018	0.03181	9
6707-6915	6761	0.018	0.03181	9
10503-10605	10555	0.018	0.02121	6
19264-19363	19313	0.018	0.02474	7
33186-33310	33242	0.018	0.02121	6
34274-34394	34323	0.018	0.03181	9
48377-48476	48426	0.018	0.03181	9
77840-77959	77889	0.018	0.03181	9
82888-82987	82937	0.018	0.02121	6
86721-86820	86770	0.018	0.01767	5
86746-86845	86795	0.018	0.01767	5
87476-87599	87549	0.018	0.03181	9
9134-9233	9183	0.01778	0.02121	6
10606-10705	10655	0.01778	0.02121	6
10982-11081	11031	0.01778	0.02121	6
11007-11106	11056	0.01778	0.02121	6
31355-31486	31436	0.01778	0.02828	8
34556-34661	34611	0.01778	0.02121	6
35420-35572	35522	0.01778	0.02121	6
47584-47688	47638	0.01778	0.02121	6
49545-49797	49600	0.01778	0.02121	6
64827-64937	64887	0.01778	0.02121	6
67647-67768	67696	0.01778	0.02828	8
70944-71072	71015	0.01778	0.02828	8
72367-72471	72421	0.01778	0.01767	5
74635-74741	74691	0.01778	0.01767	5
84956-85071	85013	0.01778	0.02828	8
132987-133113	133036	0.01778	0.02121	6
137517-137652	137602	0.01778	0.02121	6
4706-4805	4755	0.01756	0.02828	8
5770-5869	5819	0.01756	0.02828	8
6173-6272	6222	0.01756	0.02828	8
6198-6297	6247	0.01756	0.02828	8
8081-8180	8130	0.01756	0.01767	5
10350-10452	10402	0.01756	0.02828	8
10756-10855	10805	0.01756	0.02828	8
15682-15821	15741	0.01756	0.02828	8
22164-22278	22218	0.01756	0.01767	5
22194-22303	22243	0.01756	0.01767	5
28773-29220	29161	0.01756	0.02828	8
31537-31675	31587	0.01756	0.02828	8
31588-31725	31675	0.01756	0.02828	8
45078-45178	45127	0.01756	0.02828	8
50026-50148	50089	0.01756	0.02828	8
51878-51977	51927	0.01756	0.01767	5
56652-56751	56701	0.01756	0.02828	8
63447-63546	63496	0.01756	0.01767	5
65272-65376	65326	0.01756	0.02828	8
66711-66821	66760	0.01756	0.02828	8
75310-75431	75359	0.01756	0.02121	6
86546-86645	86595	0.01756	0.01767	5
89720-89819	89769	0.01756	0.02121	6
90980-91088	91029	0.01756	0.01767	5
103622-103721	103671	0.01756	0.02828	8
105124-105224	105174	0.01756	0.01767	5
132651-132753	132700	0.01756	0.02828	8
133383-133482	133432	0.01756	0.02828	8
133804-133903	133853	0.01756	0.02828	8
133829-133928	133878	0.01756	0.02828	8
133879-133982	133928	0.01756	0.02474	7
135197-135296	135246	0.01756	0.02828	8
135672-135771	135721	0.01756	0.02828	8
136896-136995	136945	0.01756	0.02828	8
137392-137491	137441	0.01756	0.02474	7
138559-138664	138608	0.01756	0.02828	8
139342-139441	139391	0.01756	0.02828	8
154113-154213	154162	0.01756	0.01767	5
166720-166882	166806	0.01756	0.02828	8
5040-5150	5091	0.01733	0.02474	7
5066-5175	5125	0.01733	0.02474	7
14069-14185	14118	0.01733	0.02474	7
14186-14301	14243	0.01733	0.02121	6
24039-24146	24089	0.01733	0.02121	6
38933-39035	38982	0.01733	0.02121	6
39462-39579	39526	0.01733	0.02474	7
44627-44737	44687	0.01733	0.01414	4
51953-52054	52002	0.01733	0.01414	4
51978-52079	52028	0.01733	0.01414	4
83271-83370	83320	0.01733	0.02474	7
83296-83395	83345	0.01733	0.02474	7
124631-124778	124728	0.01733	0.02121	6
124701-124803	124753	0.01733	0.02121	6
4567-4666	4616	0.01711	0.02474	7
5503-5611	5552	0.01711	0.02474	7
20989-21088	21038	0.01711	0.02474	7
25946-26045	25995	0.01711	0.02474	7
25971-26070	26020	0.01711	0.02474	7
28716-29161	28772	0.01711	0.02474	7
32891-32990	32940	0.01711	0.02474	7
35395-35547	35444	0.01711	0.02474	7
35598-35697	35647	0.01711	0.02474	7
49341-49445	49390	0.01711	0.02474	7
51122-51221	51171	0.01711	0.02474	7
51147-51246	51196	0.01711	0.02474	7
56416-56526	56470	0.01711	0.02474	7
64557-64675	64625	0.01711	0.02474	7
70856-70984	70918	0.01711	0.02474	7
74534-74634	74583	0.01711	0.02474	7
84380-84488	84438	0.01711	0.02474	7
84414-84513	84463	0.01711	0.02474	7
84489-84609	84538	0.01711	0.02474	7
84514-84648	84583	0.01711	0.02474	7
84539-84673	84609	0.01711	0.02474	7
89170-89269	89219	0.01711	0.02474	7
125597-125696	125646	0.01711	0.02474	7
132525-132625	132574	0.01711	0.02121	6
140627-140726	140676	0.01711	0.02474	7
158882-159002	158949	0.01711	0.02474	7
17929-18029	17978	0.01689	0.01767	5
24646-24745	24695	0.01689	0.02121	6
30777-30876	30826	0.01689	0.01767	5
31878-31977	31927	0.01689	0.02121	6
34992-35092	35041	0.01689	0.02121	6
51473-51577	51522	0.01689	0.01767	5
91030-91138	91088	0.01689	0.02121	6
91967-92068	92018	0.01689	0.02121	6
91992-92093	92043	0.01689	0.02121	6
4756-4855	4805	0.01667	0.02474	7
5692-5794	5741	0.01667	0.02121	6
10133-10248	10197	0.01667	0.02474	7
15787-15900	15850	0.01667	0.02474	7
15822-15925	15875	0.01667	0.02474	7
30253-30360	30302	0.01667	0.01767	5
33661-33800	33750	0.01667	0.02474	7
47378-47482	47432	0.01667	0.02474	7
47851-47983	47900	0.01667	0.02474	7
47876-48012	47925	0.01667	0.02474	7
62866-62971	62915	0.01667	0.02121	6
63322-63421	63371	0.01667	0.01767	5
64913-65021	64962	0.01667	0.02474	7
79436-79535	79485	0.01667	0.02474	7
83143-83245	83195	0.01667	0.01414	4
83871-83970	83920	0.01667	0.02474	7
86096-86195	86145	0.01667	0.02474	7
88306-88405	88355	0.01667	0.02121	6
123690-123789	123739	0.01667	0.02121	6
125547-125646	125596	0.01667	0.02474	7
128007-128107	128056	0.01667	0.02121	6
51498-51602	51552	0.01644	0.02121	6
63047-63146	63096	0.01644	0.01767	5
75602-75710	75660	0.01644	0.01767	5
75661-75761	75710	0.01644	0.01767	5
91367-91466	91416	0.01644	0.02121	6
133589-133695	133645	0.01644	0.01767	5
15717-15850	15786	0.01622	0.02121	6
30467-30566	30516	0.01622	0.02121	6
35523-35622	35572	0.01622	0.02121	6
35648-35747	35697	0.01622	0.01767	5
35673-35772	35722	0.01622	0.01767	5
38412-38526	38476	0.01622	0.02121	6
48827-48927	48876	0.01622	0.02121	6
48852-48952	48901	0.01622	0.02121	6
64072-64171	64121	0.01622	0.02121	6
64097-64196	64146	0.01622	0.02121	6
64334-64450	64384	0.01622	0.02121	6
64481-64581	64531	0.01622	0.02121	6
64676-64776	64725	0.01622	0.02121	6
70806-70918	70855	0.01622	0.02121	6
73821-73920	73870	0.01622	0.02121	6
76291-76400	76350	0.01622	0.01414	4
79385-79510	79460	0.01622	0.02121	6
85839-85945	85895	0.01622	0.02121	6
86121-86220	86170	0.01622	0.02121	6
88794-88894	88844	0.01622	0.02121	6
89195-89294	89244	0.01622	0.02121	6
89220-89319	89269	0.01622	0.02121	6
90167-90278	90226	0.01622	0.02121	6
124569-124728	124630	0.01622	0.02121	6
125179-125287	125228	0.01622	0.02121	6
135865-136051	136001	0.01622	0.02121	6
139142-139241	139191	0.01622	0.02121	6
1239-1338	1288	0.016	0.02121	6
1264-1372	1313	0.016	0.02121	6
3870-4045	3936	0.016	0.02828	8
5015-5125	5065	0.016	0.02828	8
7776-7885	7825	0.016	0.02828	8
7801-7910	7860	0.016	0.02828	8
9259-9363	9313	0.016	0.02828	8
17638-17750	17687	0.016	0.02828	8
17663-17775	17712	0.016	0.02828	8
28609-28715	28658	0.016	0.01767	5
34712-34824	34774	0.016	0.02828	8
34738-34849	34799	0.016	0.02828	8
38048-38161	38097	0.016	0.02828	8
48402-48501	48451	0.016	0.02828	8
55401-55507	55452	0.016	0.02828	8
67622-67742	67671	0.016	0.02828	8
83821-83920	83870	0.016	0.02828	8
84464-84583	84513	0.016	0.02828	8
86696-86795	86745	0.016	0.01414	4
103647-103746	103696	0.016	0.02828	8
103722-103823	103773	0.016	0.02828	8
127129-127236	127178	0.016	0.02828	8
134639-134747	134693	0.016	0.01767	5
135572-135671	135621	0.016	0.02828	8
155591-155690	155640	0.016	0.02828	8
2701-2800	2750	0.01578	0.02474	7
28634-28740	28683	0.01578	0.01767	5
31412-31511	31461	0.01578	0.02474	7
35243-35343	35293	0.01578	0.01767	5
35268-35369	35318	0.01578	0.01767	5
49570-49829	49772	0.01578	0.01767	5
51448-51552	51497	0.01578	0.01767	5
75936-76040	75985	0.01578	0.01767	5
91742-91841	91791	0.01578	0.01767	5
91792-91891	91841	0.01578	0.01767	5
141469-141584	141519	0.01578	0.01767	5
1449-1555	1504	0.01556	0.01414	4
2451-2550	2500	0.01556	0.02474	7
2526-2625	2575	0.01556	0.02474	7
5202-5301	5251	0.01556	0.01414	4
6148-6247	6197	0.01556	0.02474	7
10083-10197	10132	0.01556	0.02474	7
10325-10427	10377	0.01556	0.02474	7
14269-14376	14326	0.01556	0.02474	7
16938-17037	16987	0.01556	0.02474	7
21364-21463	21413	0.01556	0.02474	7
22219-22328	22278	0.01556	0.01414	4
29162-29283	29220	0.01556	0.02474	7
32078-32177	32127	0.01556	0.02474	7
34224-34323	34273	0.01556	0.02474	7
39905-40014	39964	0.01556	0.02474	7
39936-40051	39989	0.01556	0.02474	7
45103-45203	45152	0.01556	0.02474	7
71073-71781	71731	0.01556	0.02474	7
73871-73970	73920	0.01556	0.02474	7
77639-77764	77714	0.01556	0.02474	7
78017-78159	78088	0.01556	0.02121	6
81836-81935	81885	0.01556	0.02121	6
89893-90046	89975	0.01556	0.02474	7
100335-100455	100387	0.01556	0.02474	7
105150-105249	105199	0.01556	0.01414	4
132498-132599	132549	0.01556	0.02121	6
132676-132784	132728	0.01556	0.02474	7
133983-134083	134033	0.01556	0.02474	7
134963-135071	135021	0.01556	0.02474	7
134997-135096	135046	0.01556	0.02474	7
135222-135321	135271	0.01556	0.02474	7
135522-135621	135571	0.01556	0.02474	7
135840-136026	135976	0.01556	0.02474	7
138484-138583	138533	0.01556	0.02474	7
2751-2850	2800	0.01533	0.02121	6
5092-5200	5150	0.01533	0.02121	6
7701-7800	7750	0.01533	0.01767	5
10806-10906	10855	0.01533	0.02121	6
11383-11614	11432	0.01533	0.01767	5
14094-14218	14160	0.01533	0.02121	6
24064-24175	24114	0.01533	0.01767	5
24596-24695	24645	0.01533	0.02121	6
51928-52028	51977	0.01533	0.0106	3
52791-52896	52846	0.01533	0.02121	6
52816-52931	52871	0.01533	0.02121	6
70919-71047	70984	0.01533	0.02121	6
78306-78405	78355	0.01533	0.01767	5
78331-78430	78380	0.01533	0.01767	5
83246-83345	83295	0.01533	0.02121	6
90117-90226	90166	0.01533	0.01767	5
91055-91164	91113	0.01533	0.02121	6
5452-5552	5502	0.01511	0.02121	6
15202-15314	15251	0.01511	0.02121	6
19864-19963	19913	0.01511	0.01767	5
19889-19988	19938	0.01511	0.01767	5
20964-21063	21013	0.01511	0.02121	6
21014-21113	21063	0.01511	0.02121	6
32496-32605	32545	0.01511	0.02121	6
32521-32630	32570	0.01511	0.02121	6
32606-32705	32655	0.01511	0.02121	6
35093-35192	35142	0.01511	0.02121	6
38444-38558	38501	0.01511	0.02121	6
45642-45761	45691	0.01511	0.02121	6
56497-56601	56551	0.01511	0.02121	6
63097-63196	63146	0.01511	0.02121	6
63147-63246	63196	0.01511	0.02121	6
63172-63271	63221	0.01511	0.02121	6
64582-64700	64650	0.01511	0.02121	6
73508-73608	73557	0.01511	0.02121	6
79309-79435	79359	0.01511	0.01767	5
81936-82036	81985	0.01511	0.01767	5
89145-89244	89194	0.01511	0.02121	6
127932-128031	127981	0.01511	0.02121	6
136581-136695	136630	0.01511	0.02121	6
137417-137516	137466	0.01511	0.01767	5
139734-139842	139792	0.01511	0.02121	6
140602-140701	140651	0.01511	0.02121	6
151117-151227	151166	0.01511	0.01767	5
151142-151252	151201	0.01511	0.01767	5
24671-24770	24720	0.01489	0.01767	5
30228-30335	30277	0.01489	0.01767	5
73229-73357	73293	0.01489	0.01767	5
91942-92043	91991	0.01489	0.01767	5
133139-133277	133227	0.01489	0.01767	5
138811-138910	138860	0.01489	0.01767	5
138836-138935	138885	0.01489	0.01767	5
1404-1529	1479	0.01467	0.01767	5
2401-2500	2450	0.01467	0.02121	6
3820-3936	3869	0.01467	0.02121	6
4275-4385	4324	0.01467	0.02121	6
4463-4566	4516	0.01467	0.02121	6
14777-14876	14826	0.01467	0.02121	6
17751-17850	17800	0.01467	0.02121	6
20639-20738	20688	0.01467	0.02121	6
33636-33775	33725	0.01467	0.02121	6
38904-39010	38957	0.01467	0.02121	6
44577-44687	44626	0.01467	0.02121	6
44814-44948	44879	0.01467	0.02121	6
47353-47457	47407	0.01467	0.02121	6
47408-47507	47457	0.01467	0.02121	6
47433-47532	47482	0.01467	0.02121	6
48928-49036	48986	0.01467	0.02121	6
64451-64556	64506	0.01467	0.02121	6
69276-69377	69326	0.01467	0.02121	6
73358-73482	73407	0.01467	0.02121	6
82012-82112	82062	0.01467	0.01767	5
82538-82637	82587	0.01467	0.02121	6
82563-82662	82612	0.01467	0.02121	6
84856-84955	84905	0.01467	0.02121	6
86046-86145	86095	0.01467	0.02121	6
91417-91516	91466	0.01467	0.02121	6
124729-124828	124778	0.01467	0.02121	6
127957-128056	128006	0.01467	0.01767	5
127982-128081	128031	0.01467	0.01767	5
8510-8627	8559	0.01444	0.01767	5
75636-75735	75685	0.01444	0.01414	4
138911-139010	138960	0.01444	0.01767	5
138936-139035	138985	0.01444	0.01767	5
2626-2725	2675	0.01422	0.01767	5
3795-3907	3844	0.01422	0.01767	5
10932-11031	10981	0.01422	0.01767	5
10957-11056	11006	0.01422	0.01767	5
15470-15577	15519	0.01422	0.01767	5
17979-18079	18029	0.01422	0.01767	5
22139-22243	22193	0.01422	0.01767	5
23989-24089	24038	0.01422	0.01767	5
32289-32388	32338	0.01422	0.01767	5
38836-38957	38903	0.01422	0.01767	5
38861-38982	38932	0.01422	0.01767	5
44763-44879	44813	0.01422	0.01767	5
55638-55762	55712	0.01422	0.01767	5
65147-65246	65196	0.01422	0.01414	4
69251-69352	69301	0.01422	0.01767	5
78456-78555	78505	0.01422	0.01767	5
82213-82312	82262	0.01422	0.01767	5
108995-109113	109062	0.01422	0.01414	4
133037-133163	133113	0.01422	0.01767	5
150226-150326	150275	0.01422	0.01414	4
1480-1580	1529	0.014	0.01414	4
1505-1605	1555	0.014	0.01414	4
8131-8230	8180	0.014	0.01414	4
15851-15950	15900	0.014	0.02474	7
28478-28583	28527	0.014	0.02474	7
28503-28608	28558	0.014	0.02474	7
33161-33273	33210	0.014	0.01414	4
34775-34885	34824	0.014	0.02474	7
47718-47825	47775	0.014	0.01767	5
49939-50055	49988	0.014	0.02474	7
64279-64384	64333	0.014	0.01414	4
67597-67696	67646	0.014	0.02474	7
69667-69771	69716	0.014	0.02474	7
72911-73020	72960	0.014	0.02474	7
74096-74197	74145	0.014	0.01414	4
79461-79560	79510	0.014	0.02474	7
82488-82587	82537	0.014	0.02474	7
86471-86570	86520	0.014	0.01414	4
86496-86595	86545	0.014	0.01414	4
86521-86620	86570	0.014	0.01414	4
103747-103848	103798	0.014	0.02474	7
105200-105299	105249	0.014	0.01414	4
124779-124878	124828	0.014	0.02474	7
128057-128167	128107	0.014	0.02474	7
132423-132524	132472	0.014	0.02474	7
132729-132835	132784	0.014	0.02474	7
133854-133953	133903	0.014	0.02474	7
134614-134718	134668	0.014	0.01414	4
134811-134937	134874	0.014	0.02474	7
134836-134962	134912	0.014	0.02474	7
137943-138042	137992	0.014	0.02474	7
137968-138067	138017	0.014	0.02474	7
138043-138142	138092	0.014	0.02474	7
154038-154137	154087	0.014	0.01414	4
155489-155590	155538	0.014	0.02474	7
155514-155615	155563	0.014	0.02474	7
2726-2825	2775	0.01378	0.02121	6
13705-13804	13754	0.01378	0.01414	4
13730-13829	13779	0.01378	0.01414	4
13755-13854	13804	0.01378	0.01414	4
28528-28633	28583	0.01378	0.02121	6
31049-31225	31110	0.01378	0.02121	6
75961-76065	76015	0.01378	0.01414	4
76141-76240	76190	0.01378	0.01414	4
85272-85371	85321	0.01378	0.01414	4
91767-91866	91816	0.01378	0.01414	4
136002-136101	136051	0.01378	0.01414	4
137492-137627	137577	0.01378	0.01414	4
139117-139216	139166	0.01378	0.0106	3
2476-2575	2525	0.01356	0.02121	6
2501-2600	2550	0.01356	0.02121	6
2926-3028	2975	0.01356	0.02121	6
4965-5065	5014	0.01356	0.02121	6
5795-5894	5844	0.01356	0.02121	6
7961-8080	8010	0.01356	0.01767	5
9916-10132	10082	0.01356	0.02121	6
10706-10805	10755	0.01356	0.02121	6
10731-10830	10780	0.01356	0.02121	6
15520-15656	15577	0.01356	0.02121	6
16701-16807	16750	0.01356	0.02121	6
19239-19338	19288	0.01356	0.01767	5
22354-22453	22403	0.01356	0.02121	6
22379-22478	22428	0.01356	0.02121	6
23938-24038	23988	0.01356	0.02121	6
23964-24063	24013	0.01356	0.02121	6
28741-29195	29126	0.01356	0.02121	6
29127-29258	29195	0.01356	0.02121	6
32053-32152	32102	0.01356	0.02121	6
32471-32570	32520	0.01356	0.02121	6
34199-34298	34248	0.01356	0.02121	6
45128-45228	45178	0.01356	0.02121	6
50056-50174	50123	0.01356	0.02121	6
50250-50358	50300	0.01356	0.02121	6
50275-50383	50333	0.01356	0.02121	6
56391-56496	56445	0.01356	0.02121	6
64122-64221	64171	0.01356	0.02121	6
64147-64246	64196	0.01356	0.02121	6
71907-72006	71956	0.01356	0.02121	6
73846-73945	73895	0.01356	0.02121	6
74767-74884	74816	0.01356	0.02121	6
74792-74909	74855	0.01356	0.02121	6
75838-75960	75910	0.01356	0.02121	6
77614-77739	77663	0.01356	0.02121	6
79284-79384	79334	0.01356	0.01767	5
81115-81214	81164	0.01356	0.02121	6
84439-84538	84488	0.01356	0.02121	6
85697-85813	85756	0.01356	0.02121	6
92019-92118	92068	0.01356	0.02121	6
95377-95476	95426	0.01356	0.02121	6
108136-108245	108195	0.01356	0.01767	5
109214-109313	109263	0.01356	0.02121	6
109628-109728	109678	0.01356	0.02121	6
124804-124903	124853	0.01356	0.02121	6
125322-125421	125371	0.01356	0.02121	6
127482-127581	127531	0.01356	0.01767	5
128032-128142	128081	0.01356	0.02121	6
133408-133513	133457	0.01356	0.02121	6
135247-135346	135296	0.01356	0.02121	6
135272-135371	135321	0.01356	0.02121	6
135697-135796	135746	0.01356	0.02121	6
138509-138608	138558	0.01356	0.02121	6
139653-139758	139702	0.01356	0.02121	6
139678-139792	139733	0.01356	0.02121	6
149611-149711	149660	0.01356	0.02121	6
150026-150125	150075	0.01356	0.02121	6
163861-163960	163910	0.01356	0.02121	6
166670-166806	166719	0.01356	0.02121	6
166695-166839	166744	0.01356	0.02121	6
166745-166907	166839	0.01356	0.02121	6
2776-2875	2825	0.01333	0.01767	5
7651-7750	7700	0.01333	0.01414	4
7676-7775	7725	0.01333	0.01414	4
11408-11654	11458	0.01333	0.01414	4
11433-11679	11614	0.01333	0.01414	4
19055-19154	19104	0.01333	0.01414	4
31828-31927	31877	0.01333	0.01767	5
31853-31952	31902	0.01333	0.01767	5
46038-46140	46087	0.01333	0.01414	4
46063-46165	46112	0.01333	0.01414	4
46088-46190	46140	0.01333	0.01414	4
52212-52322	52267	0.01333	0.01767	5
52741-52846	52790	0.01333	0.01767	5
52766-52871	52815	0.01333	0.01767	5
64222-64333	64278	0.01333	0.01767	5
65677-65776	65726	0.01333	0.01767	5
82613-82712	82662	0.01333	0.01414	4
89245-89344	89294	0.01333	0.01414	4
91342-91441	91391	0.01333	0.01767	5
113598-113697	113647	0.01333	0.01767	5
127346-127452	127395	0.01333	0.01767	5
133614-133720	133670	0.01333	0.01767	5
145640-145739	145689	0.01333	0.01767	5
2051-2150	2100	0.01311	0.01767	5
2076-2175	2125	0.01311	0.01767	5
2101-2200	2150	0.01311	0.01767	5
10581-10680	10630	0.01311	0.01767	5
11057-11156	11106	0.01311	0.01767	5
25921-26020	25970	0.01311	0.01767	5
29943-30042	29992	0.01311	0.01767	5
29968-30067	30017	0.01311	0.01767	5
32916-33015	32965	0.01311	0.01767	5
44713-44813	44762	0.01311	0.01767	5
45667-45786	45725	0.01311	0.01767	5
47533-47638	47583	0.01311	0.01767	5
47558-47663	47613	0.01311	0.01767	5
49127-49238	49188	0.01311	0.01767	5
84355-84463	84413	0.01311	0.01767	5
84584-84698	84648	0.01311	0.01767	5
88281-88380	88330	0.01311	0.01767	5
88356-88455	88405	0.01311	0.01767	5
89923-90071	90007	0.01311	0.01767	5
91717-91816	91766	0.01311	0.01767	5
98028-98127	98077	0.01311	0.01767	5
98053-98152	98102	0.01311	0.01767	5
111805-111904	111854	0.01311	0.01767	5
117753-117868	117817	0.01311	0.01767	5
117778-117893	117843	0.01311	0.01767	5
118561-118660	118610	0.01311	0.01767	5
123408-123513	123463	0.01311	0.01767	5
136077-136281	136126	0.01311	0.01767	5
137442-137577	137491	0.01311	0.01414	4
139943-140042	139992	0.01311	0.01767	5
139968-140067	140017	0.01311	0.01767	5
140652-140751	140701	0.01311	0.01767	5
140677-140776	140726	0.01311	0.01767	5
150413-150534	150462	0.01311	0.01767	5
161185-161284	161234	0.01311	0.01767	5
161210-161309	161259	0.01311	0.01767	5
3079-3178	3128	0.01289	0.01414	4
8206-8305	8255	0.01289	0.01414	4
8231-8330	8280	0.01289	0.01414	4
39437-39554	39501	0.01289	0.01414	4
52003-52104	52054	0.01289	0.01414	4
63022-63121	63071	0.01289	0.01414	4
63072-63171	63121	0.01289	0.01414	4
75686-75787	75735	0.01289	0.01414	4
133564-133670	133613	0.01289	0.01414	4
1801-1900	1850	0.01267	0.01767	5
2376-2475	2425	0.01267	0.01767	5
2426-2525	2475	0.01267	0.01767	5
2651-2750	2700	0.01267	0.01767	5
2676-2775	2725	0.01267	0.01767	5
4096-4199	4149	0.01267	0.01767	5
4175-4274	4224	0.01267	0.01767	5
5667-5769	5716	0.01267	0.01414	4
5870-5970	5919	0.01267	0.01767	5
5895-5995	5945	0.01267	0.01767	5
7861-7960	7910	0.01267	0.01767	5
10108-10223	10157	0.01267	0.01767	5
12005-12104	12054	0.01267	0.01414	4
12055-12154	12104	0.01267	0.01414	4
14752-14851	14801	0.01267	0.01767	5
20414-20513	20463	0.01267	0.01767	5
20439-20538	20488	0.01267	0.01767	5
20589-20688	20638	0.01267	0.01767	5
33611-33750	33660	0.01267	0.01767	5
34800-34916	34849	0.01267	0.01767	5
35168-35267	35217	0.01267	0.01414	4
38335-38443	38384	0.01267	0.01767	5
39855-39964	39904	0.01267	0.01767	5
44277-44376	44326	0.01267	0.01767	5
44527-44626	44576	0.01267	0.01767	5
44552-44651	44601	0.01267	0.01767	5
65977-66076	66026	0.01267	0.01767	5
66002-66101	66051	0.01267	0.01767	5
66152-66263	66206	0.01267	0.01767	5
74666-74766	74716	0.01267	0.01414	4
75458-75558	75508	0.01267	0.01767	5
75509-75635	75558	0.01267	0.01767	5
75534-75660	75583	0.01267	0.01767	5
78261-78380	78330	0.01267	0.01767	5
83796-83895	83845	0.01267	0.01767	5
83896-83995	83945	0.01267	0.01767	5
98993-99092	99042	0.01267	0.01767	5
104049-104148	104098	0.01267	0.01414	4
125497-125596	125546	0.01267	0.01767	5
127075-127178	127128	0.01267	0.01767	5
155189-155288	155238	0.01267	0.01414	4
160245-160344	160294	0.01267	0.01767	5
82863-82962	82912	0.01244	0.01414	4
2601-2700	2650	0.01222	0.01414	4
8036-8155	8105	0.01222	0.01414	4
17954-18054	18004	0.01222	0.01414	4
18980-19079	19029	0.01222	0.01414	4
35445-35597	35547	0.01222	0.01414	4
46716-46815	46765	0.01222	0.0106	3
70781-70880	70830	0.01222	0.01414	4
72584-72684	72634	0.01222	0.01414	4
82238-82337	82287	0.01222	0.01414	4
82263-82362	82312	0.01222	0.01414	4
85921-86020	85970	0.01222	0.01414	4
89095-89194	89144	0.01222	0.01414	4
89120-89219	89169	0.01222	0.01414	4
90142-90251	90191	0.01222	0.01414	4
90955-91054	91004	0.01222	0.01414	4
125129-125228	125178	0.01222	0.01414	4
125154-125253	125203	0.01222	0.01414	4
141444-141559	141493	0.01222	0.01414	4
1530-1638	1580	0.012	0.0106	3
3937-4095	4045	0.012	0.02121	6
4990-5091	5039	0.012	0.02121	6
7751-7860	7800	0.012	0.02121	6
7826-7935	7885	0.012	0.02121	6
10403-10502	10452	0.012	0.02121	6
11680-11779	11729	0.012	0.02121	6
11730-11829	11779	0.012	0.02121	6
14244-14351	14301	0.012	0.02121	6
14802-14901	14851	0.012	0.02121	6
19439-19538	19488	0.012	0.02121	6
24434-24553	24503	0.012	0.02121	6
28453-28558	28502	0.012	0.02121	6
31726-31827	31777	0.012	0.02121	6
39880-39989	39935	0.012	0.02121	6
45028-45127	45077	0.012	0.02121	6
46566-46665	46615	0.012	0.02121	6
46998-47100	47047	0.012	0.02121	6
47508-47613	47557	0.012	0.02121	6
49914-50025	49963	0.012	0.02121	6
52666-52765	52715	0.012	0.02121	6
64304-64425	64358	0.012	0.0106	3
68769-68868	68818	0.012	0.02121	6
68794-68893	68843	0.012	0.02121	6
69327-69441	69377	0.012	0.02121	6
69503-69607	69552	0.012	0.01414	4
72886-72985	72935	0.012	0.02121	6
74121-74233	74170	0.012	0.0106	3
75863-75985	75935	0.012	0.02121	6
79486-79585	79535	0.012	0.02121	6
87625-87727	87674	0.012	0.02121	6
92394-92493	92443	0.012	0.02121	6
92419-92526	92468	0.012	0.02121	6
105175-105274	105224	0.012	0.0106	3
124754-124853	124803	0.012	0.02121	6
127212-127320	127270	0.012	0.02121	6
132298-132397	132347	0.012	0.02121	6
134310-134409	134359	0.012	0.02121	6
134460-134559	134509	0.012	0.02121	6
136556-136655	136605	0.012	0.02121	6
139317-139416	139366	0.012	0.02121	6
154063-154162	154112	0.012	0.0106	3
154088-154187	154137	0.012	0.0106	3
8535-8662	8602	0.01178	0.01767	5
13680-13779	13729	0.01178	0.0106	3
25221-25320	25270	0.01178	0.01767	5
25271-25370	25320	0.01178	0.01767	5
75986-76090	76040	0.01178	0.0106	3
85247-85346	85296	0.01178	0.0106	3
127321-127420	127370	0.01178	0.01767	5
136027-136126	136076	0.01178	0.0106	3
2951-3053	3003	0.01156	0.01767	5
8748-8854	8800	0.01156	0.01767	5
9941-10157	10107	0.01156	0.01767	5
19180-19288	19238	0.01156	0.01414	4
20214-20313	20263	0.01156	0.01767	5
20239-20338	20288	0.01156	0.01767	5
20714-20813	20763	0.01156	0.01767	5
21389-21488	21438	0.01156	0.01767	5
23010-23109	23059	0.01156	0.01767	5
25896-25995	25945	0.01156	0.01767	5
27796-27895	27845	0.01156	0.01767	5
31437-31536	31486	0.01156	0.01767	5
31487-31587	31536	0.01156	0.01767	5
31903-32002	31952	0.01156	0.01767	5
32571-32680	32630	0.01156	0.01767	5
35042-35142	35092	0.01156	0.01767	5
35068-35167	35117	0.01156	0.01767	5
40477-40576	40526	0.01156	0.01767	5
45617-45725	45666	0.01156	0.01767	5
48252-48351	48301	0.01156	0.01767	5
49887-49988	49938	0.01156	0.01767	5
50225-50333	50274	0.01156	0.01767	5
51803-51902	51852	0.01156	0.01767	5
52591-52690	52640	0.01156	0.01767	5
52847-52957	52896	0.01156	0.01767	5
55863-55962	55912	0.01156	0.01767	5
56089-56188	56138	0.01156	0.01767	5
56114-56215	56163	0.01156	0.01767	5
56832-56931	56881	0.01156	0.01767	5
64507-64625	64556	0.01156	0.01767	5
66872-66971	66921	0.01156	0.01767	5
67247-67346	67296	0.01156	0.01767	5
70881-71015	70943	0.01156	0.01767	5
73896-73995	73945	0.01156	0.01767	5
75285-75399	75334	0.01156	0.01767	5
75813-75935	75862	0.01156	0.01767	5
76977-77076	77026	0.01156	0.01767	5
77002-77108	77051	0.01156	0.01767	5
77690-77789	77739	0.01156	0.01767	5
81090-81189	81139	0.01156	0.01767	5
81911-82011	81960	0.01156	0.01414	4
88053-88155	88102	0.01156	0.01767	5
88481-88580	88530	0.01156	0.01767	5
88506-88605	88555	0.01156	0.01767	5
91667-91766	91716	0.01156	0.01767	5
108060-108170	108109	0.01156	0.01767	5
109653-109757	109703	0.01156	0.01767	5
109679-109782	109728	0.01156	0.01767	5
109997-110104	110054	0.01156	0.01767	5
125347-125446	125396	0.01156	0.01767	5
127507-127606	127556	0.01156	0.01414	4
133114-133252	133163	0.01156	0.01767	5
133433-133538	133482	0.01156	0.01767	5
133458-133563	133513	0.01156	0.01767	5
134938-135046	134996	0.01156	0.01767	5
136921-137020	136970	0.01156	0.01767	5
139703-139817	139758	0.01156	0.01767	5
149235-149342	149284	0.01156	0.01767	5
149557-149660	149610	0.01156	0.01767	5
149586-149686	149635	0.01156	0.01767	5
150051-150150	150100	0.01156	0.01767	5
1556-1663	1605	0.01133	0.01414	4
10831-10931	10880	0.01133	0.01414	4
14161-14268	14218	0.01133	0.0106	3
20089-20188	20138	0.01133	0.01414	4
20114-20213	20163	0.01133	0.01414	4
20139-20238	20188	0.01133	0.01414	4
28584-28683	28633	0.01133	0.01414	4
31803-31902	31852	0.01133	0.01414	4
33128-33242	33185	0.01133	0.01414	4
39780-39879	39829	0.01133	0.0106	3
52030-52129	52079	0.01133	0.01414	4
64247-64358	64303	0.01133	0.01414	4
65702-65801	65751	0.01133	0.01414	4
78381-78480	78430	0.01133	0.0106	3
82638-82737	82687	0.01133	0.0106	3
83118-83220	83170	0.01133	0.0106	3
85597-85696	85646	0.01133	0.01414	4
89270-89369	89319	0.01133	0.0106	3
101259-101358	101308	0.01133	0.01414	4
134560-134668	134609	0.01133	0.01414	4
134585-134693	134638	0.01133	0.01414	4
157979-158078	158028	0.01133	0.01414	4
2126-2225	2175	0.01111	0.01414	4
2976-3078	3028	0.01111	0.01414	4
3104-3203	3153	0.01111	0.01414	4
11032-11131	11081	0.01111	0.01414	4
24996-25095	25045	0.01111	0.01414	4
25021-25120	25070	0.01111	0.01414	4
25046-25145	25095	0.01111	0.01414	4
29893-29992	29942	0.01111	0.01414	4
29918-30017	29967	0.01111	0.01414	4
35143-35242	35192	0.01111	0.01414	4
51347-51472	51422	0.01111	0.01414	4
64532-64650	64581	0.01111	0.01414	4
71099-71806	71756	0.01111	0.01414	4
72262-72366	72316	0.01111	0.01414	4
88820-88919	88869	0.01111	0.01414	4
91273-91391	91341	0.01111	0.01414	4
95452-95551	95501	0.01111	0.01414	4
98078-98177	98127	0.01111	0.01414	4
117728-117843	117777	0.01111	0.01414	4
125622-125721	125671	0.01111	0.01414	4
147435-147534	147484	0.01111	0.01414	4
151202-151302	151252	0.01111	0.01414	4
161160-161259	161209	0.01111	0.01414	4
163786-163885	163835	0.01111	0.01414	4
10882-10981	10931	0.01089	0.0106	3
73269-73382	73318	0.01089	0.0106	3
73294-73407	73357	0.01089	0.0106	3
73319-73443	73382	0.01089	0.0106	3
88156-88255	88205	0.01089	0.0106	3
92921-93020	92970	0.01089	0.0106	3
127607-127706	127656	0.01089	0.0106	3
127632-127731	127681	0.01089	0.0106	3
133514-133613	133563	0.01089	0.0106	3
133539-133645	133588	0.01089	0.0106	3
166317-166419	166366	0.01089	0.0106	3
1826-1925	1875	0.01067	0.01414	4
1851-1950	1900	0.01067	0.01414	4
3279-3378	3328	0.01067	0.01414	4
10453-10555	10502	0.01067	0.01414	4
10656-10755	10705	0.01067	0.01414	4
12030-12129	12079	0.01067	0.0106	3
14402-14501	14451	0.01067	0.01414	4
18905-19004	18954	0.01067	0.01414	4
18930-19029	18979	0.01067	0.01414	4
20614-20713	20663	0.01067	0.01414	4
20664-20763	20713	0.01067	0.01414	4
24090-24200	24146	0.01067	0.01414	4
25071-25170	25120	0.01067	0.01414	4
25146-25245	25195	0.01067	0.01414	4
26421-26520	26470	0.01067	0.01414	4
29820-29942	29892	0.01067	0.01414	4
33586-33725	33635	0.01067	0.01414	4
38958-39060	39010	0.01067	0.01414	4
39580-39679	39629	0.01067	0.01414	4
44302-44401	44351	0.01067	0.01414	4
44502-44601	44551	0.01067	0.01414	4
44788-44923	44838	0.01067	0.01414	4
65952-66051	66001	0.01067	0.01414	4
67022-67121	67071	0.01067	0.01414	4
67047-67146	67096	0.01067	0.01414	4
67297-67396	67346	0.01067	0.0106	3
67322-67421	67371	0.01067	0.0106	3
69528-69632	69582	0.01067	0.01414	4
75432-75533	75482	0.01067	0.01414	4
76662-76776	76714	0.01067	0.01414	4
76687-76801	76751	0.01067	0.01414	4
78431-78530	78480	0.01067	0.01414	4
82188-82287	82237	0.01067	0.01414	4
82313-82412	82362	0.01067	0.01414	4
84831-84930	84880	0.01067	0.01414	4
87071-87170	87120	0.01067	0.01414	4
87096-87195	87145	0.01067	0.01414	4
87121-87220	87170	0.01067	0.01414	4
87321-87426	87370	0.01067	0.01414	4
89420-89519	89469	0.01067	0.01414	4
91442-91541	91491	0.01067	0.01414	4
91817-91916	91866	0.01067	0.01414	4
99018-99117	99067	0.01067	0.01414	4
99043-99142	99092	0.01067	0.01414	4
104074-104173	104123	0.01067	0.0106	3
104099-104198	104148	0.01067	0.0106	3
104774-104873	104823	0.01067	0.01414	4
104799-104898	104848	0.01067	0.01414	4
104849-104948	104898	0.01067	0.01414	4
109729-109837	109782	0.01067	0.01414	4
149502-149610	149556	0.01067	0.01414	4
154389-154488	154438	0.01067	0.01414	4
154439-154538	154488	0.01067	0.01414	4
154464-154563	154513	0.01067	0.01414	4
155139-155238	155188	0.01067	0.0106	3
155164-155263	155213	0.01067	0.0106	3
160220-160319	160269	0.01067	0.01414	4
14327-14426	14376	0.01022	0.0106	3
14352-14451	14401	0.01022	0.0106	3
19005-19104	19054	0.01022	0.0106	3
19030-19129	19079	0.01022	0.0106	3
27546-27645	27595	0.01022	0.00707	2
27571-27670	27620	0.01022	0.00707	2
37598-37697	37647	0.01022	0.0106	3
43952-44051	44001	0.01022	0.0106	3
43977-44076	44026	0.01022	0.0106	3
46741-46840	46790	0.01022	0.00707	2
46766-46865	46815	0.01022	0.00707	2
46791-46890	46840	0.01022	0.00707	2
58457-58556	58506	0.01022	0.0106	3
66922-67021	66971	0.01022	0.0106	3
66972-67071	67021	0.01022	0.0106	3
76116-76215	76165	0.01022	0.0106	3
79335-79460	79384	0.01022	0.0106	3
79360-79485	79435	0.01022	0.0106	3
84805-84905	84855	0.01022	0.0106	3
85297-85396	85346	0.01022	0.0106	3
86596-86695	86645	0.01022	0.0106	3
86621-86720	86670	0.01022	0.0106	3
135977-136076	136026	0.01022	0.0106	3
141419-141519	141468	0.01022	0.0106	3
141494-141609	141559	0.01022	0.0106	3
99-213	163	0.01	0.01767	5
2251-2350	2300	0.01	0.01767	5
2276-2375	2325	0.01	0.01767	5
2901-3003	2950	0.01	0.01767	5
3304-3403	3353	0.01	0.01767	5
3354-3594	3403	0.01	0.01767	5
5562-5666	5611	0.01	0.01767	5
5845-5945	5894	0.01	0.01767	5
8106-8205	8155	0.01	0.00707	2
9083-9183	9133	0.01	0.01767	5
11705-11804	11754	0.01	0.01767	5
14827-14926	14876	0.01	0.01767	5
15876-15975	15925	0.01	0.01767	5
19389-19488	19438	0.01	0.01767	5
19414-19513	19463	0.01	0.01767	5
19964-20063	20013	0.01	0.01767	5
20564-20663	20613	0.01	0.01767	5
21339-21438	21388	0.01	0.01767	5
23888-23988	23937	0.01	0.01767	5
24821-24920	24870	0.01	0.01767	5
29576-29682	29625	0.01	0.01767	5
29993-30093	30042	0.01	0.01767	5
31643-31752	31700	0.01	0.01767	5
31778-31877	31827	0.01	0.01767	5
35573-35672	35622	0.01	0.01767	5
39312-39411	39361	0.01	0.01767	5
44227-44326	44276	0.01	0.01767	5
44252-44351	44301	0.01	0.01767	5
46541-46640	46590	0.01	0.01767	5
46591-46690	46640	0.01	0.01767	5
47023-47126	47075	0.01	0.01767	5
48277-48376	48326	0.01	0.01767	5
48302-48401	48351	0.01	0.01767	5
52243-52365	52292	0.01	0.01767	5
52293-52460	52365	0.01	0.01767	5
52616-52715	52665	0.01	0.01767	5
52641-52740	52690	0.01	0.01767	5
52691-52790	52740	0.01	0.01767	5
64197-64303	64246	0.01	0.01767	5
67197-67296	67246	0.01	0.01767	5
67572-67671	67621	0.01	0.01767	5
69302-69402	69352	0.01	0.01767	5
69353-69466	69402	0.01	0.01767	5
69403-69527	69466	0.01	0.0106	3
69442-69552	69502	0.01	0.0106	3
69467-69582	69527	0.01	0.0106	3
72037-72136	72086	0.01	0.01767	5
82463-82562	82512	0.01	0.01767	5
83171-83270	83220	0.01	0.00707	2
83196-83295	83245	0.01	0.00707	2
84071-84179	84129	0.01	0.01767	5
91089-91189	91138	0.01	0.01767	5
95327-95426	95376	0.01	0.01767	5
96967-97066	97016	0.01	0.01767	5
109239-109338	109288	0.01	0.01767	5
109603-109703	109652	0.01	0.01767	5
110022-110129	110079	0.01	0.01767	5
127237-127345	127295	0.01	0.01767	5
134009-134108	134058	0.01	0.01767	5
134335-134434	134384	0.01	0.01767	5
134410-134509	134459	0.01	0.01767	5
134435-134534	134484	0.01	0.01767	5
134510-134609	134559	0.01	0.01767	5
134535-134638	134584	0.01	0.01767	5
134875-134996	134937	0.01	0.01767	5
134913-135021	134962	0.01	0.01767	5
136996-137095	137045	0.01	0.01767	5
137342-137441	137391	0.01	0.01767	5
137367-137466	137416	0.01	0.01767	5
137993-138092	138042	0.01	0.01767	5
138534-138639	138583	0.01	0.01767	5
149210-149317	149259	0.01	0.01767	5
149636-149736	149686	0.01	0.01767	5
150001-150100	150050	0.01	0.01767	5
162271-162370	162320	0.01	0.01767	5
163911-164010	163960	0.01	0.01767	5
25246-25345	25295	0.00978	0.01414	4
28559-28658	28608	0.00978	0.01414	4
31024-31157	31082	0.00978	0.01414	4
44984-45102	45052	0.00978	0.01414	4
2551-2650	2600	0.00956	0.01414	4
2576-2675	2625	0.00956	0.01414	4
6298-6397	6347	0.00956	0.01414	4
8011-8130	8080	0.00956	0.01414	4
8774-8879	8829	0.00956	0.01414	4
12930-13029	12979	0.00956	0.01414	4
14302-14401	14351	0.00956	0.01414	4
15177-15289	15226	0.00956	0.01414	4
16251-16350	16300	0.00956	0.01414	4
16276-16375	16325	0.00956	0.01414	4
18005-18104	18054	0.00956	0.01414	4
19205-19313	19263	0.00956	0.0106	3
20264-20363	20313	0.00956	0.01414	4
20289-20388	20338	0.00956	0.01414	4
20939-21038	20988	0.00956	0.01414	4
21039-21138	21088	0.00956	0.01414	4
21164-21263	21213	0.00956	0.01414	4
21414-21513	21463	0.00956	0.01414	4
21989-22088	22038	0.00956	0.01414	4
22329-22428	22378	0.00956	0.01414	4
22404-22503	22453	0.00956	0.01414	4
23035-23134	23084	0.00956	0.01414	4
24226-24333	24276	0.00956	0.01414	4
25996-26095	26045	0.00956	0.01414	4
27771-27870	27820	0.00956	0.01414	4
32941-33040	32990	0.00956	0.01414	4
35017-35117	35067	0.00956	0.01414	4
38811-38932	38860	0.00956	0.01414	4
39112-39240	39161	0.00956	0.01414	4
39965-40076	40014	0.00956	0.01414	4
40152-40251	40201	0.00956	0.01414	4
40452-40551	40501	0.00956	0.01414	4
40502-40601	40551	0.00956	0.01414	4
40527-40626	40576	0.00956	0.01414	4
40902-41001	40951	0.00956	0.0106	3
40927-41026	40976	0.00956	0.0106	3
[truncated: 3,734 more rows]
