# Supplementary figures and images for: Chloroplast Genome Comparison and Evolution Analysis of Dendrobium (Orchidaceae) among Multiple Photosynthetic Pathways
Source: Preprints.org preprint supplement (doi:10.20944/preprints202312.2150.v1), 2023-12-29

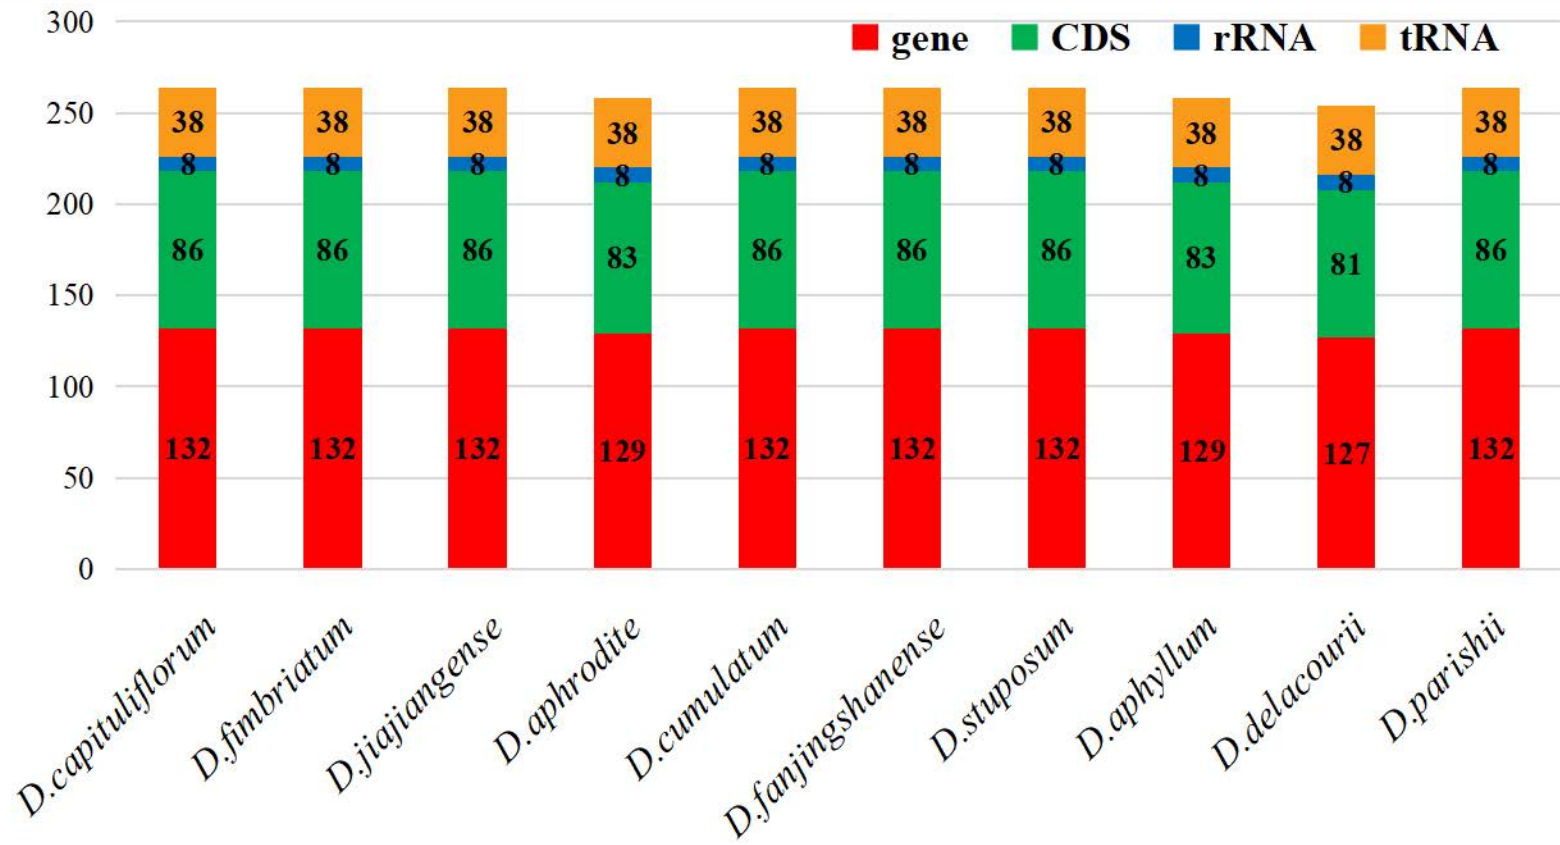

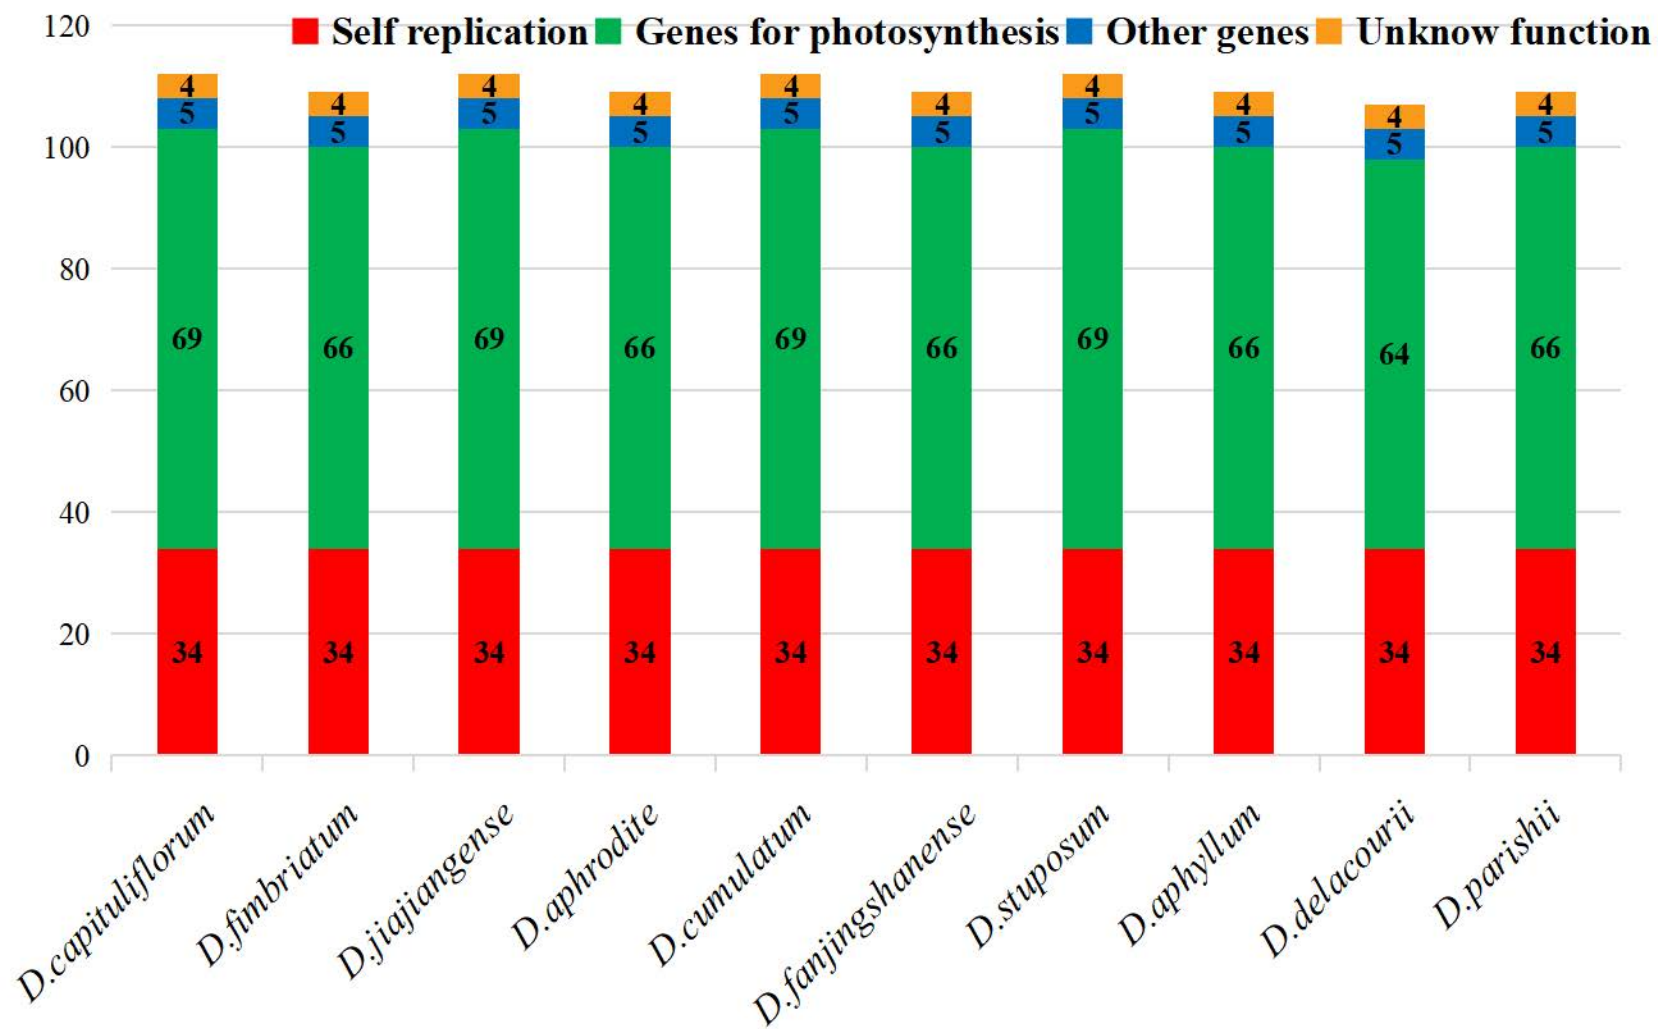

Supplement: Supplementary file 1 [file supplementary]
